# Supplementary material for: Phylogenetic Evidence for Lateral Gene Transfer in the Intestine of Marine Iguanas
Source: PubMed Central journal article supplement (PMC2875401; doi:10.1371/journal.pone.0010785), 2010-05-24

Figure S2

a) CDS1

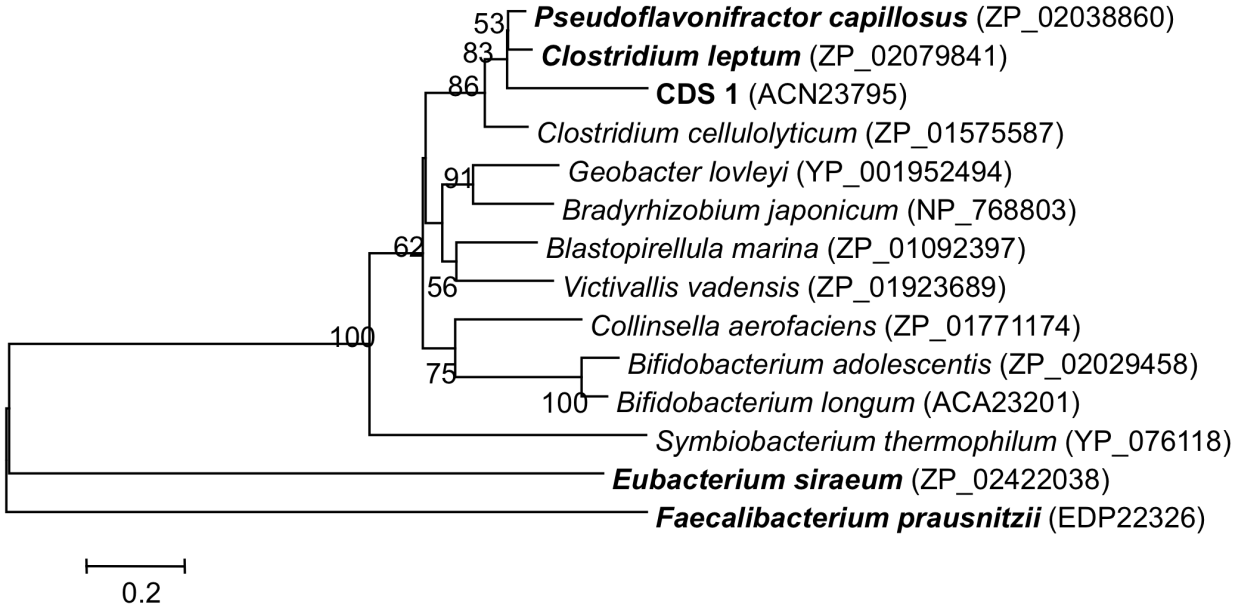

b) CDS 3

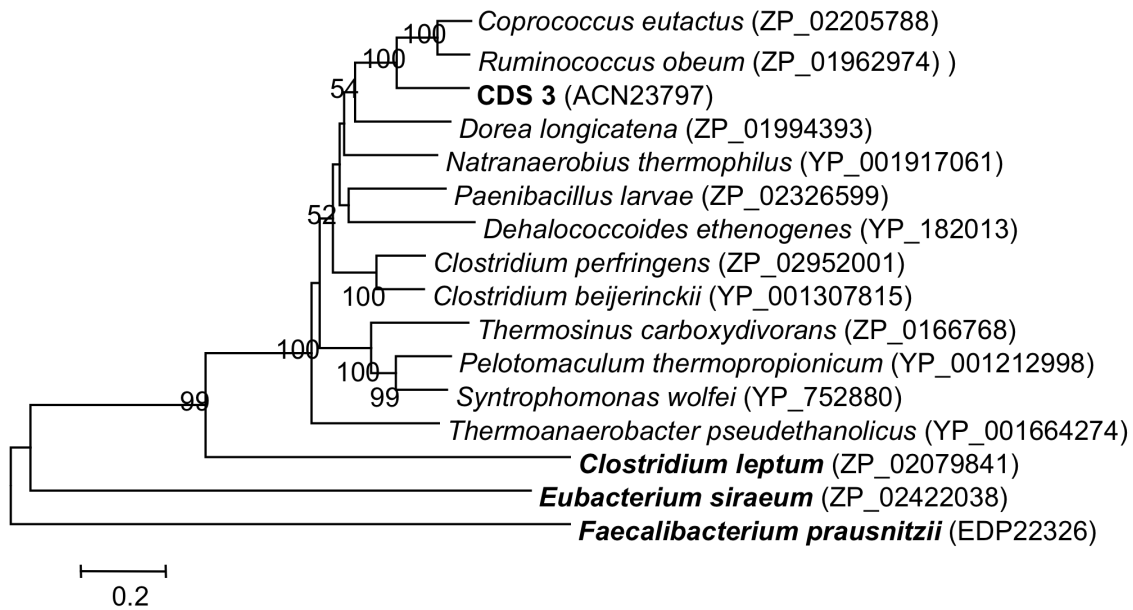

c) CDS 6

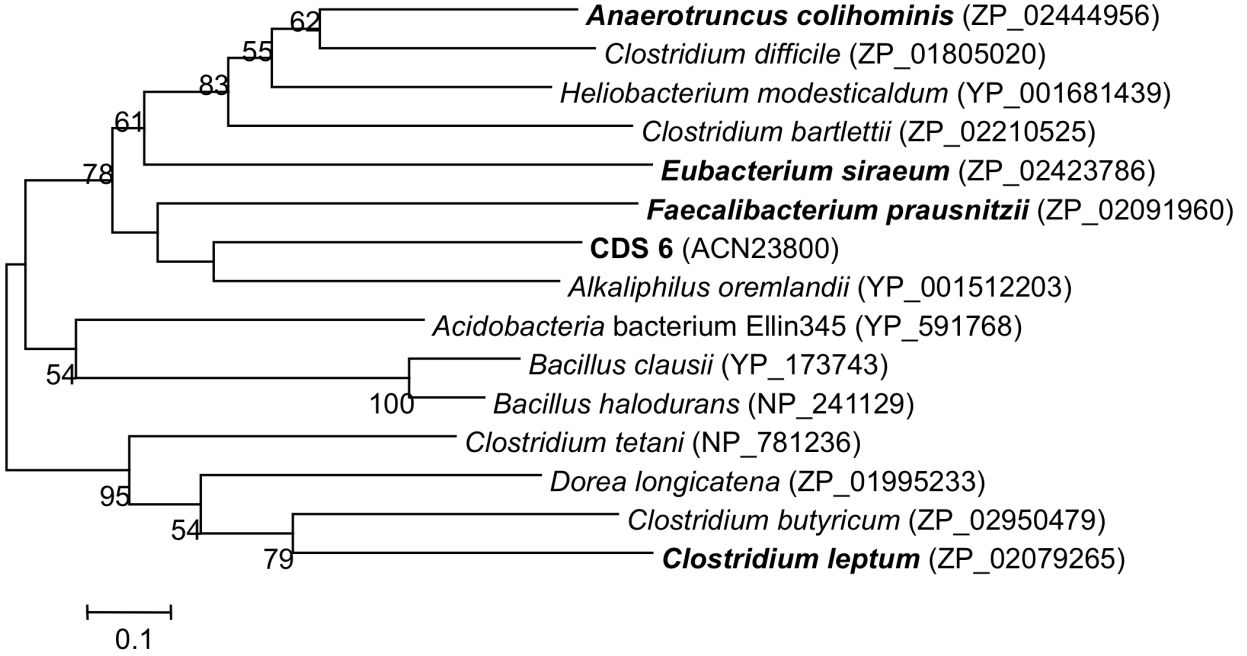

d) CDS 8

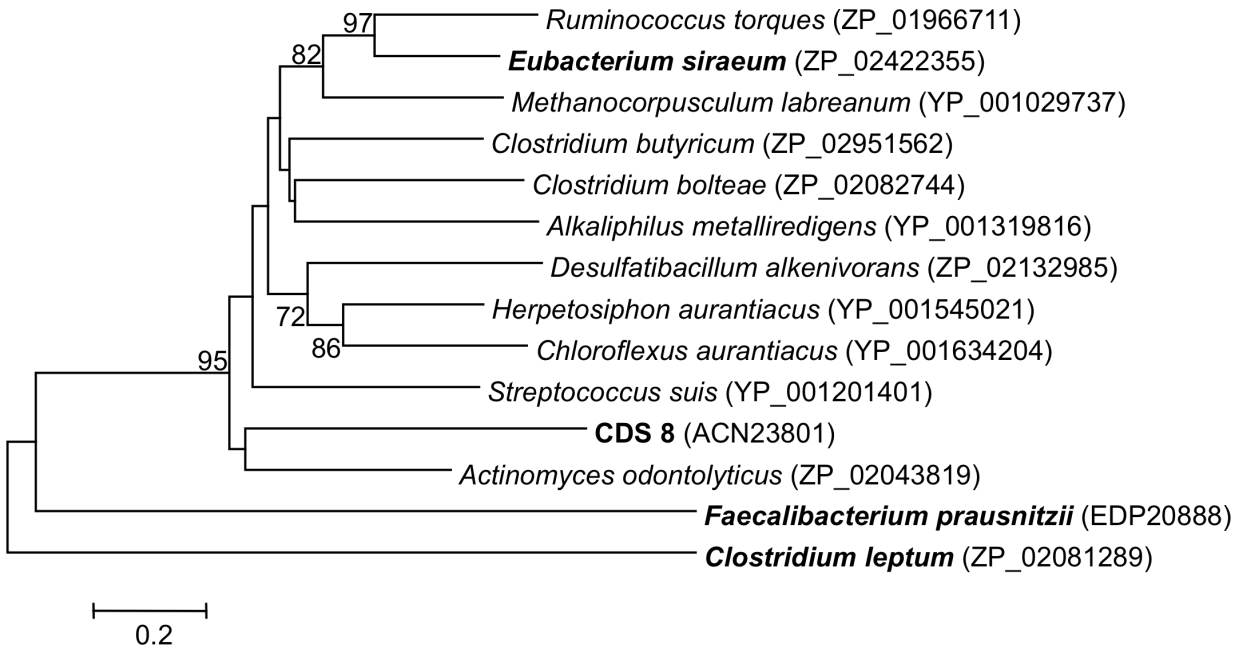

e) CDS 9

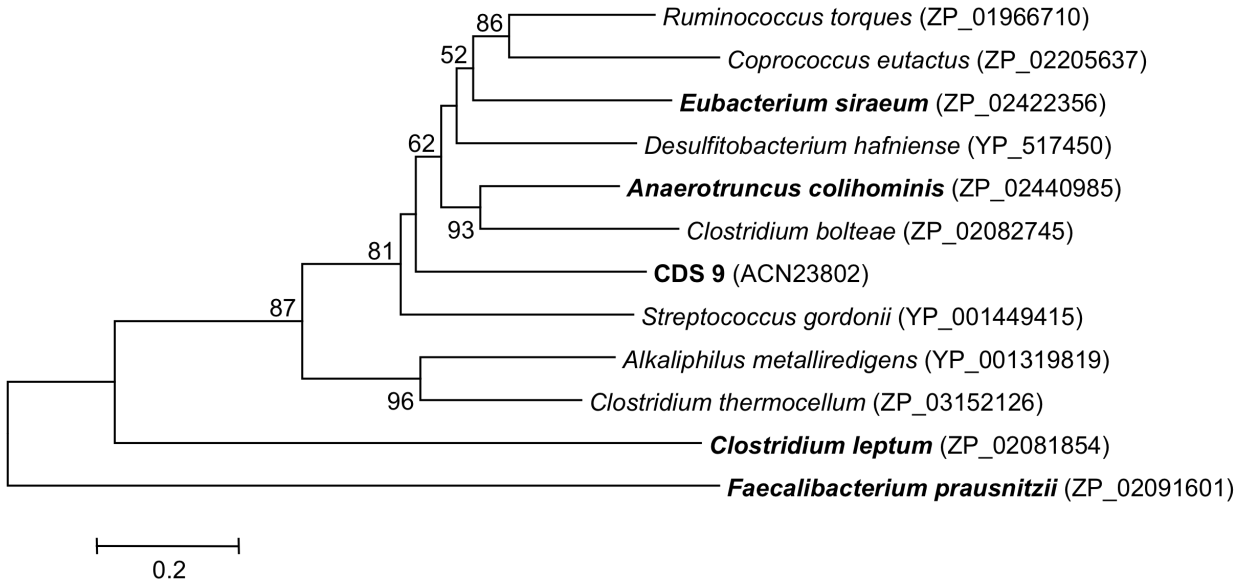

f) CDS 10

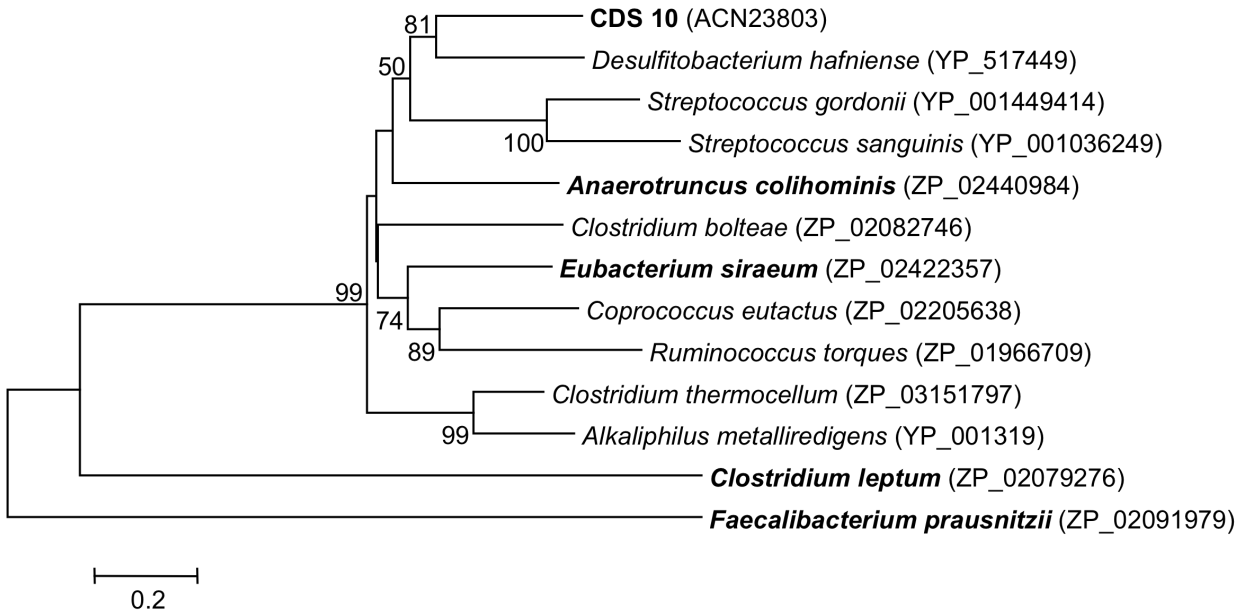

g) CDS 11

Neighbor joining

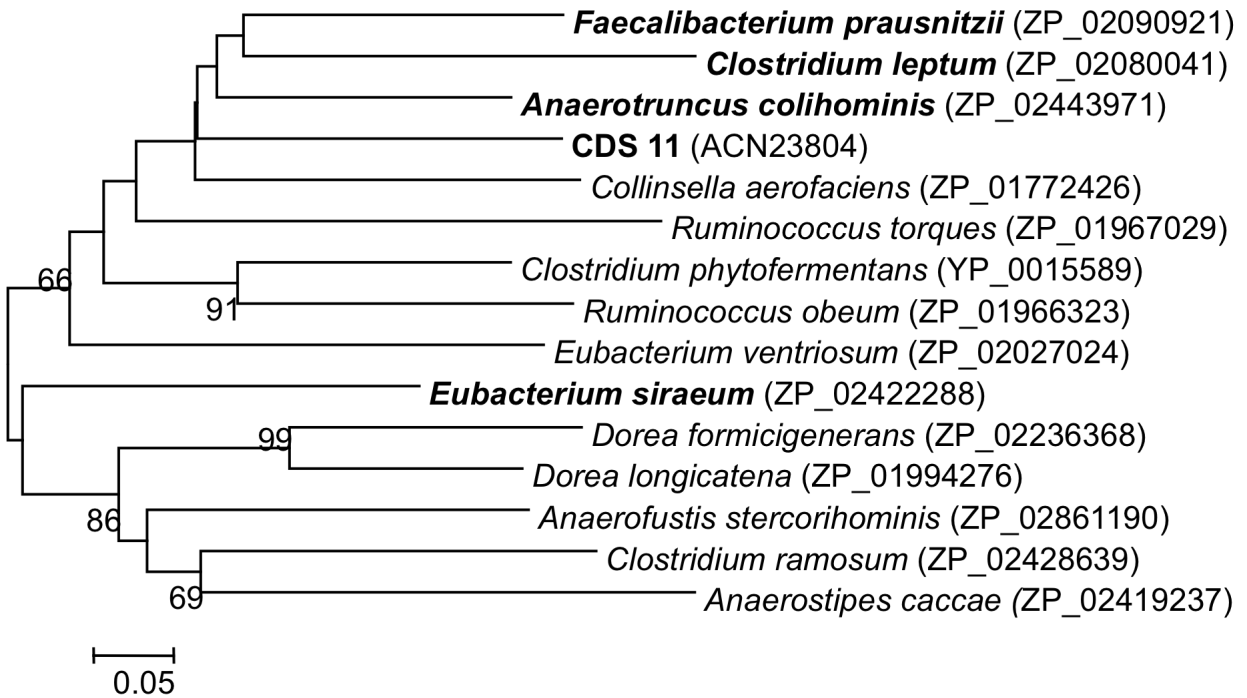

Maximum likelihood

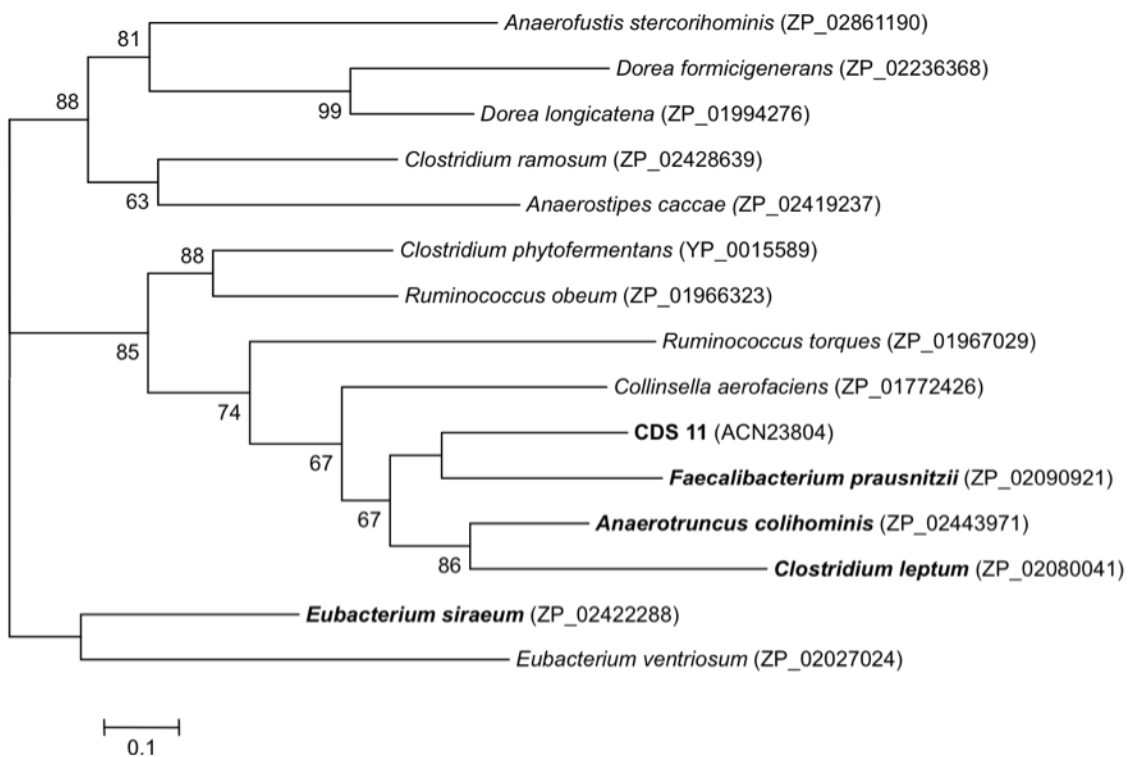

h) CDS 12

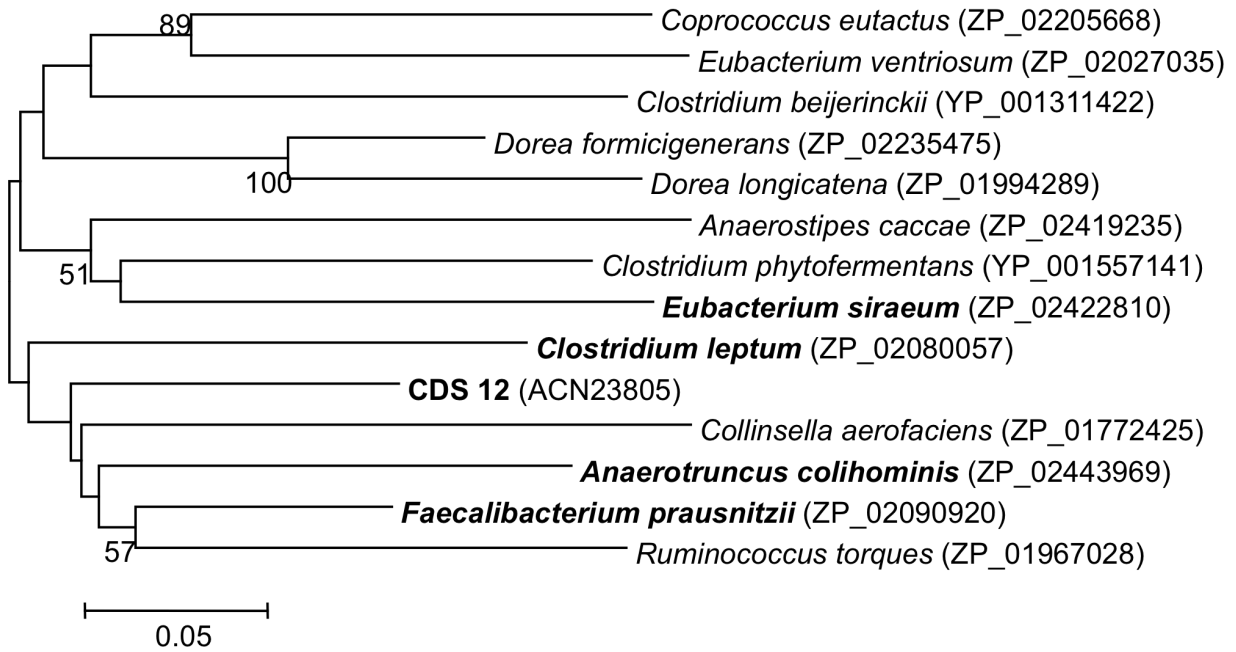

i) CDS 13

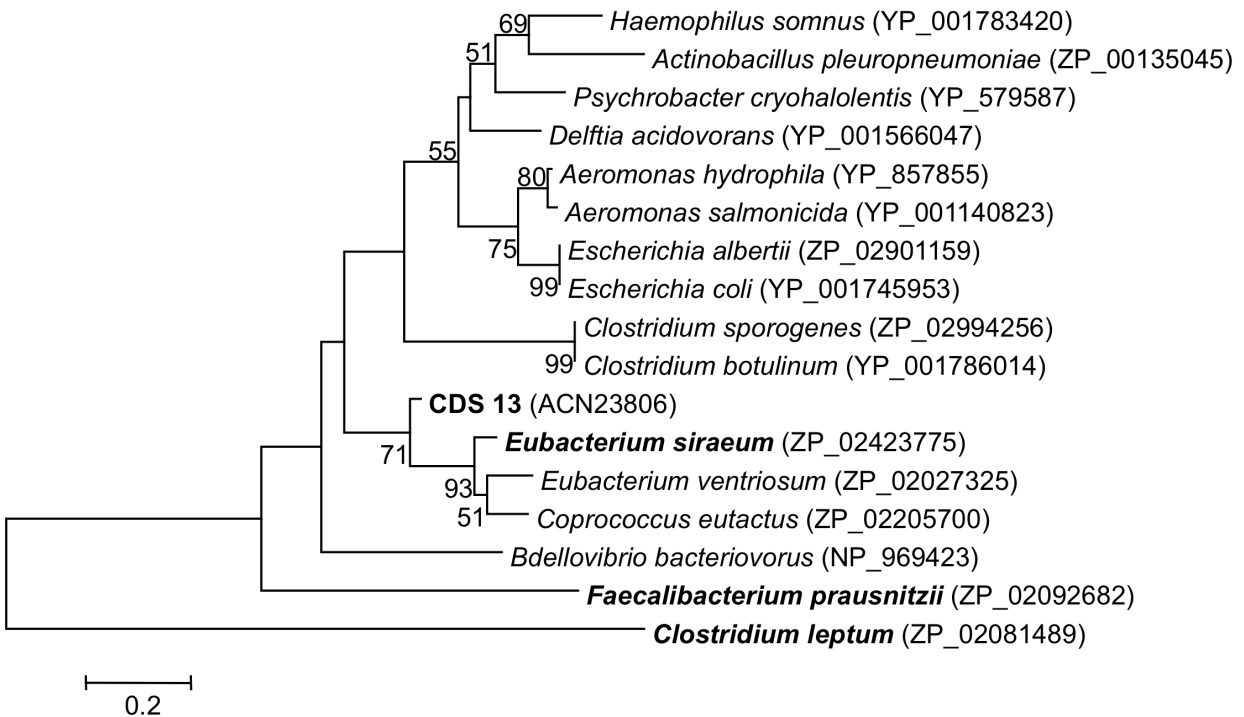

j) CDS 14

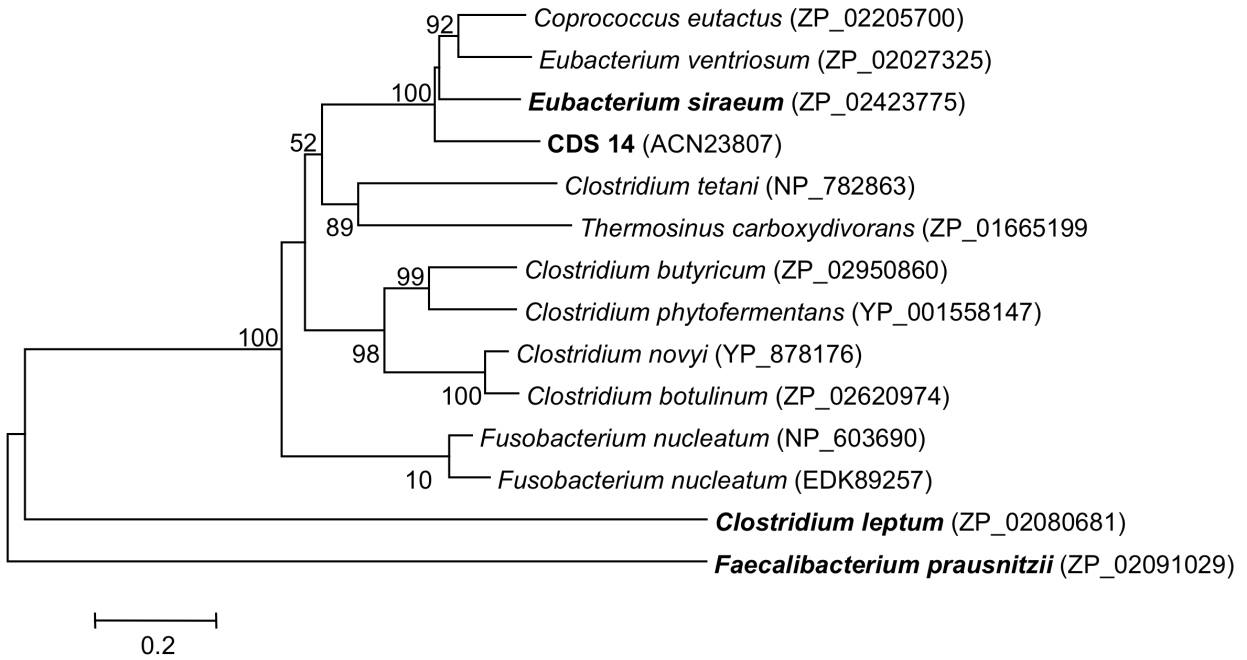

k) CDS 15

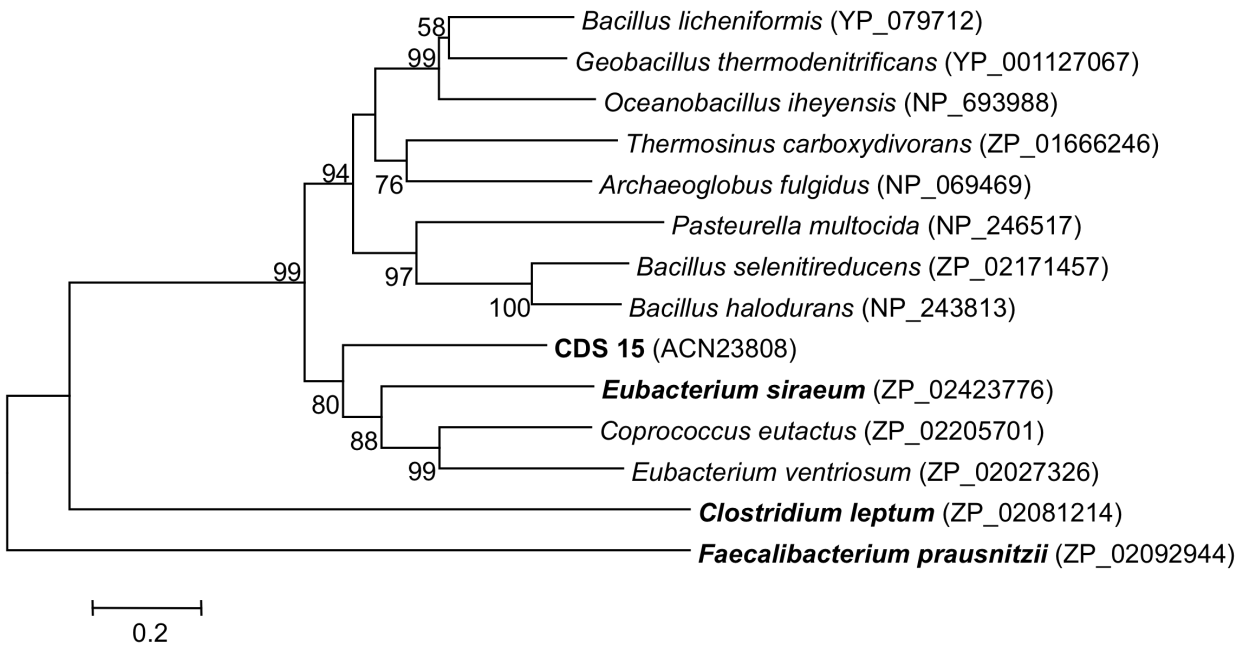

l) CDS 16

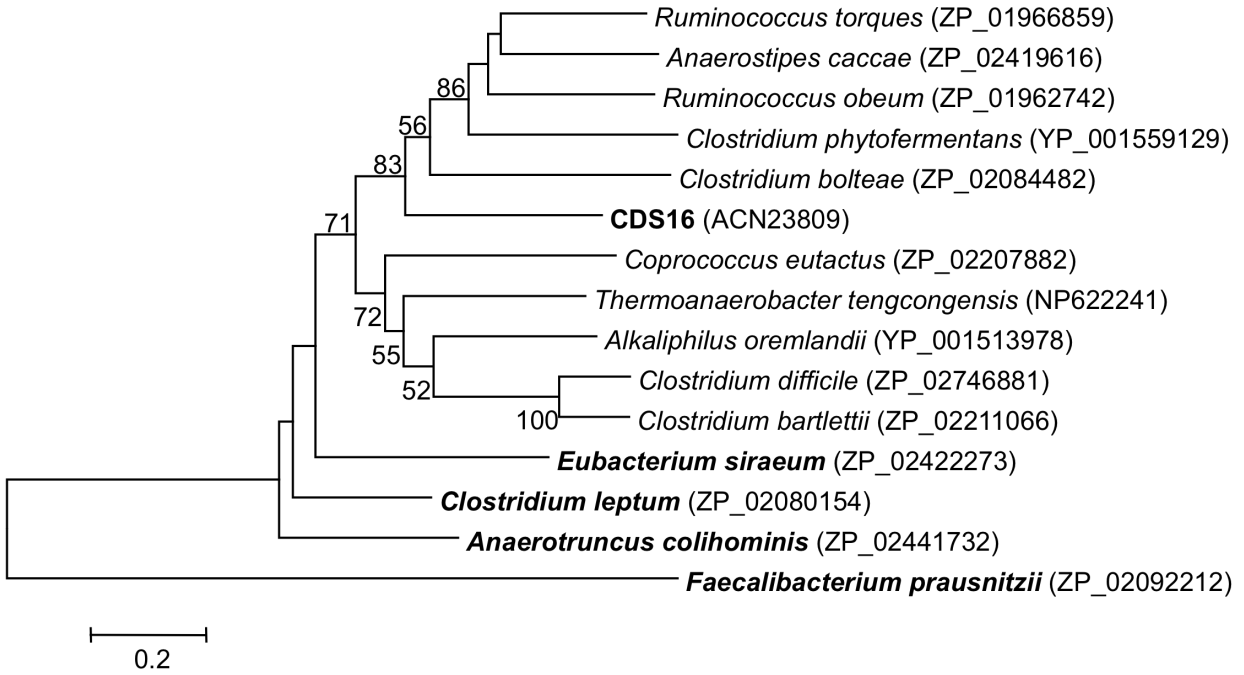

m) CDS 17

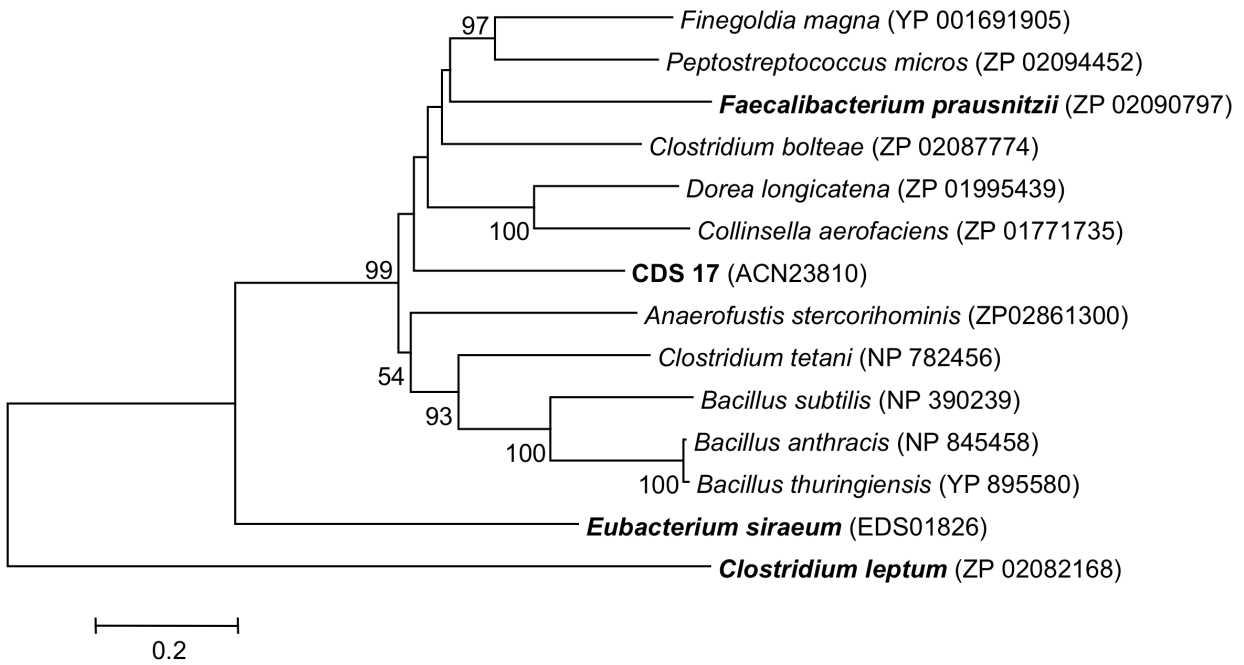

n) CDS 18

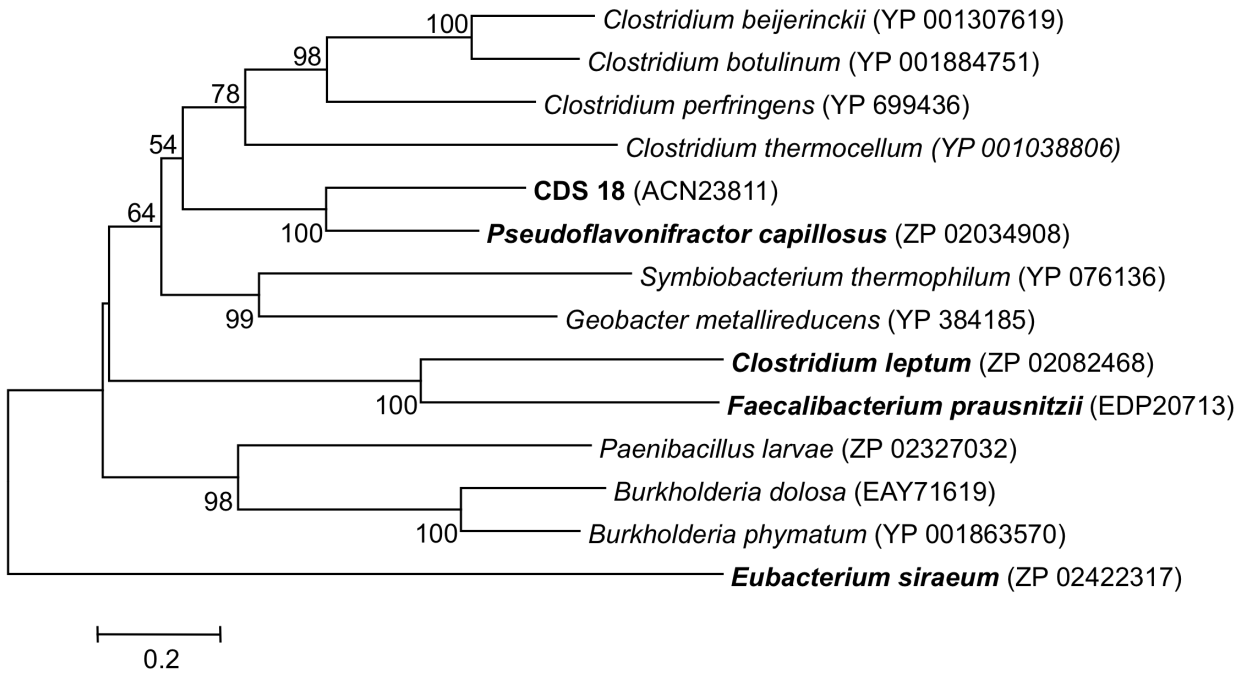

o) CDS 19

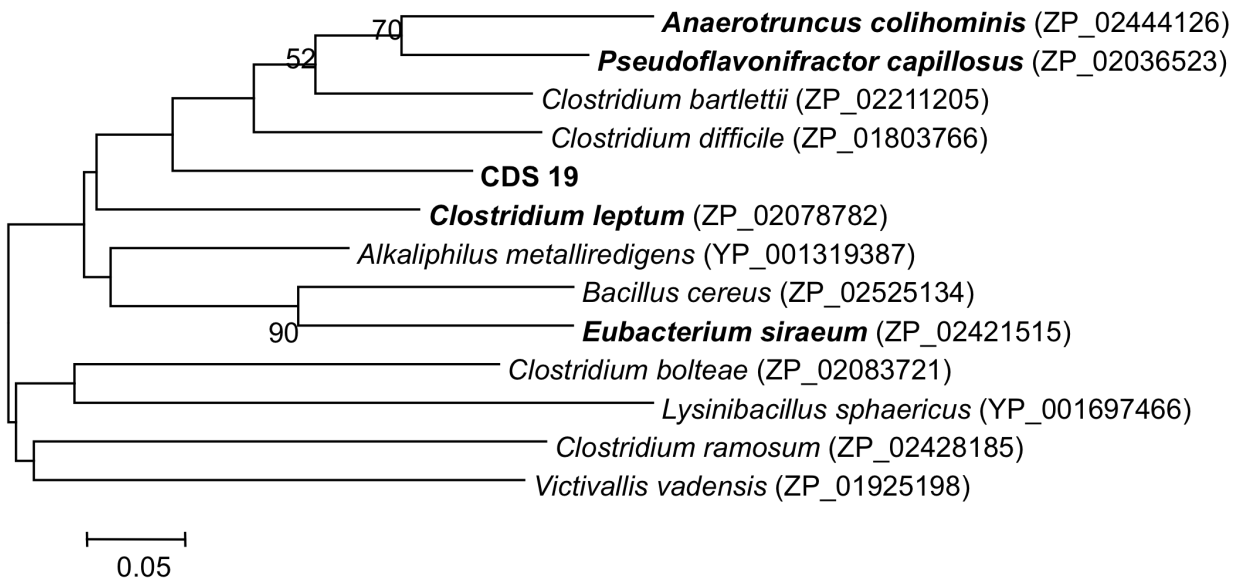



p) CDS 20

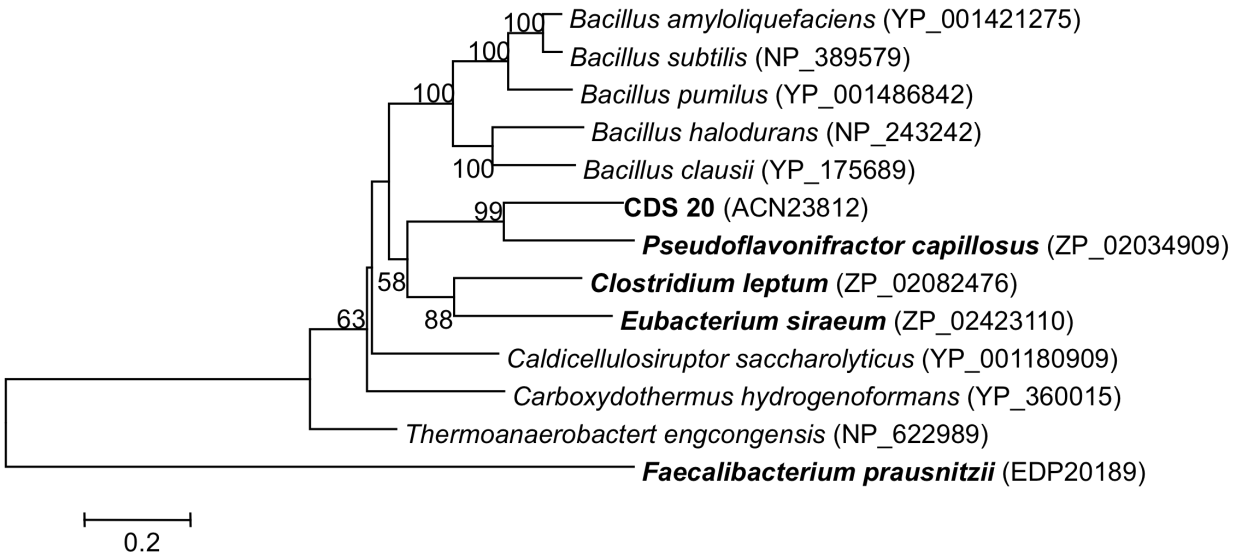

q) CDS 21

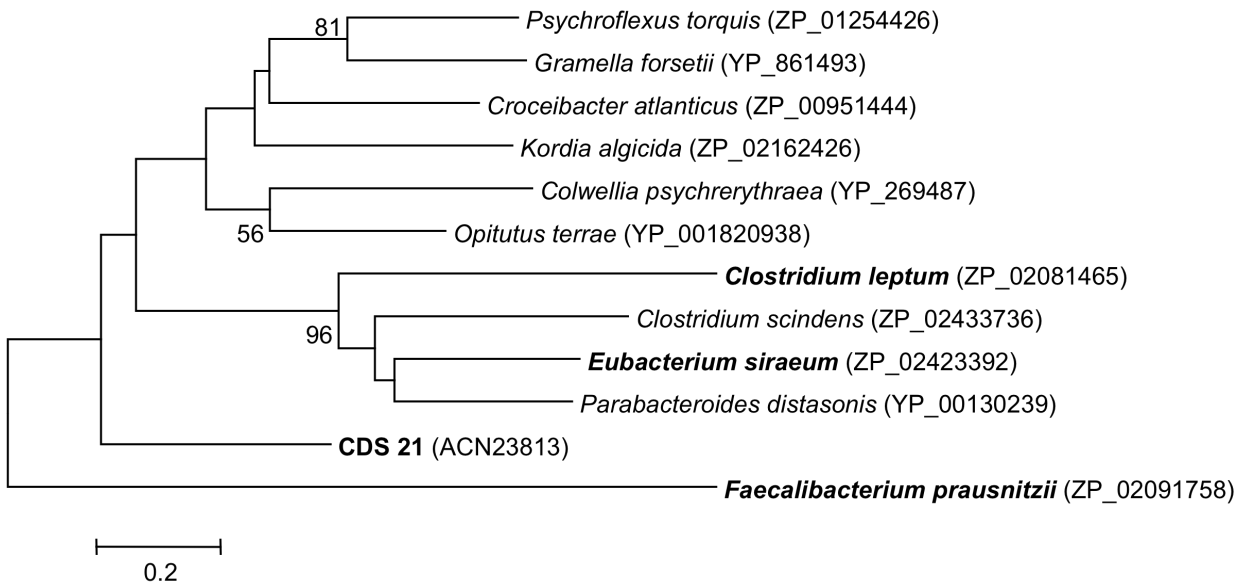

r) CDS 22

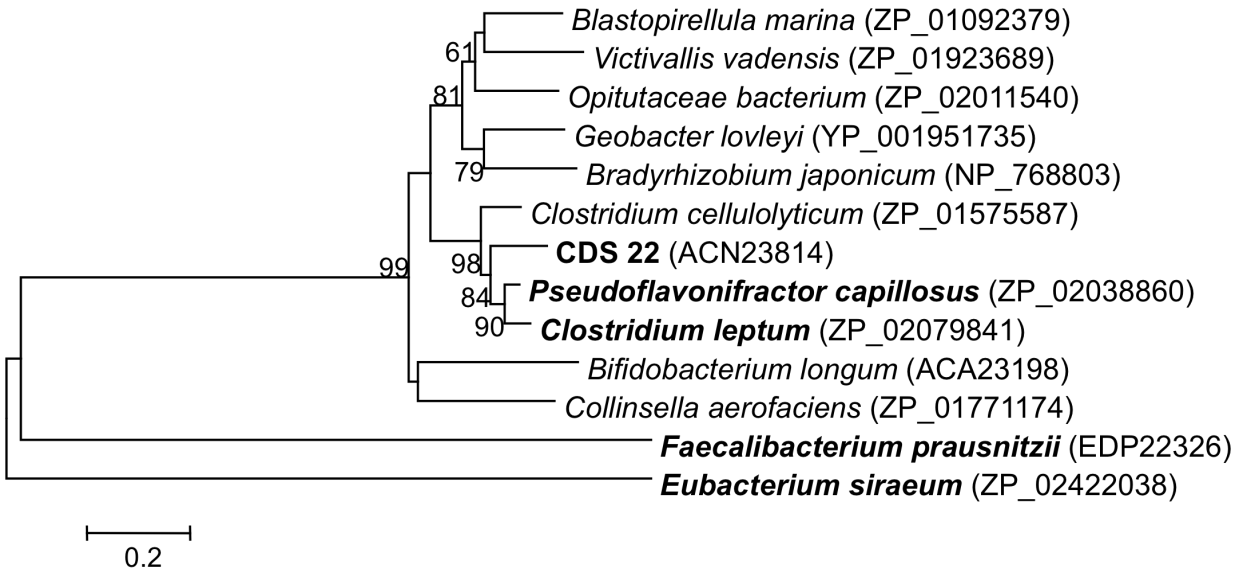

s) CDS 29

Neighbor joining

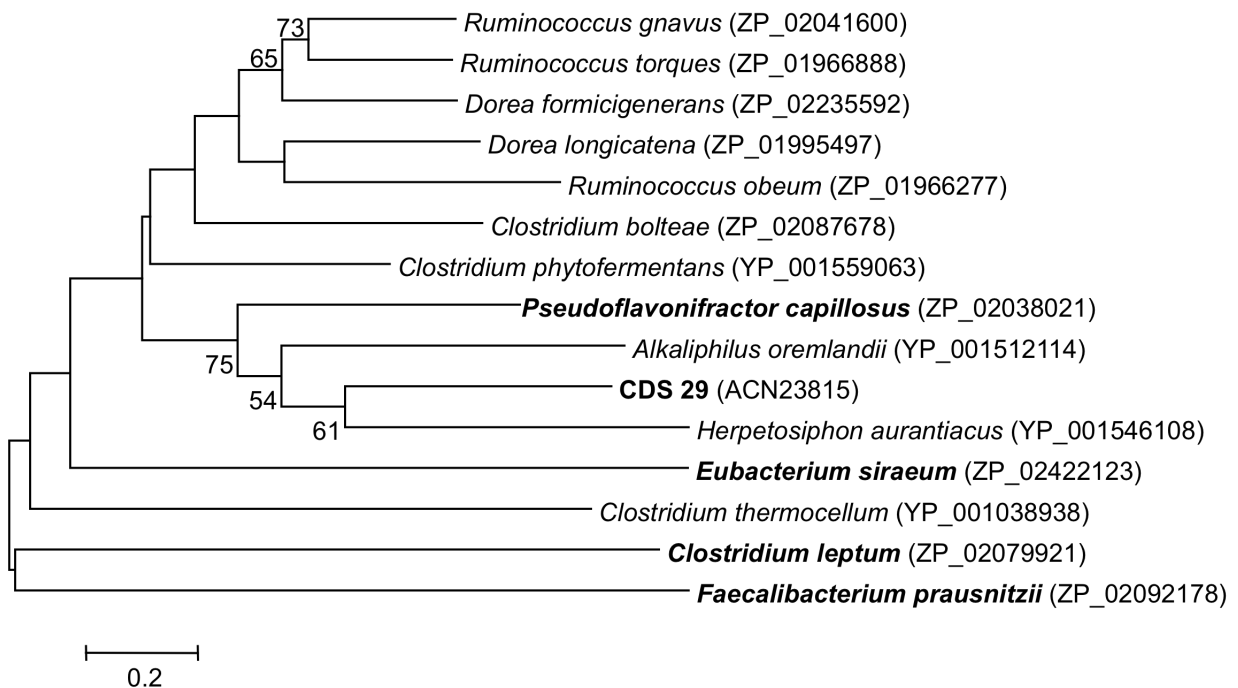

Maximum likelihood

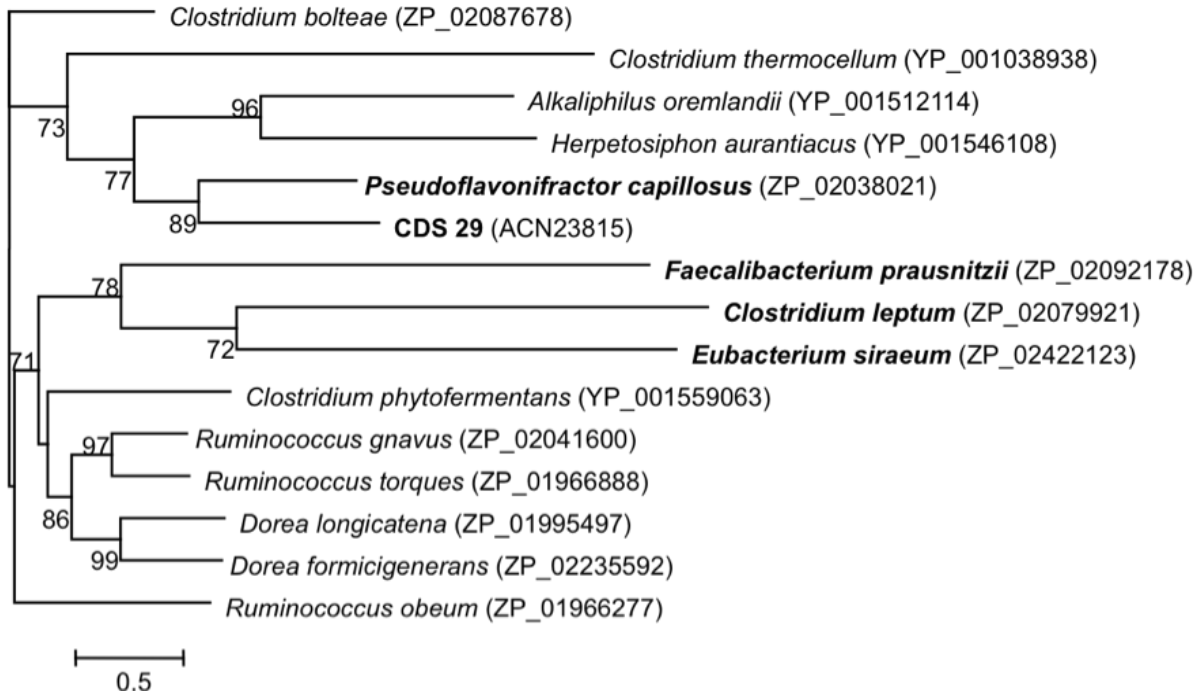

t) CDS 30

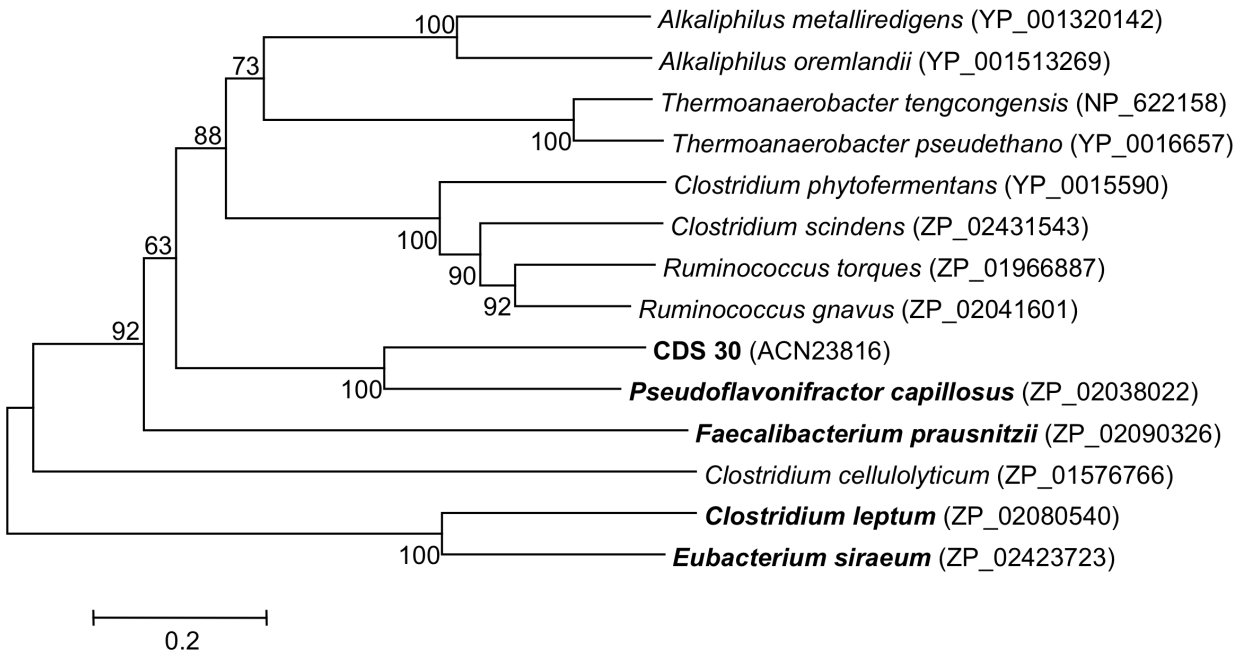

u) CDS 31

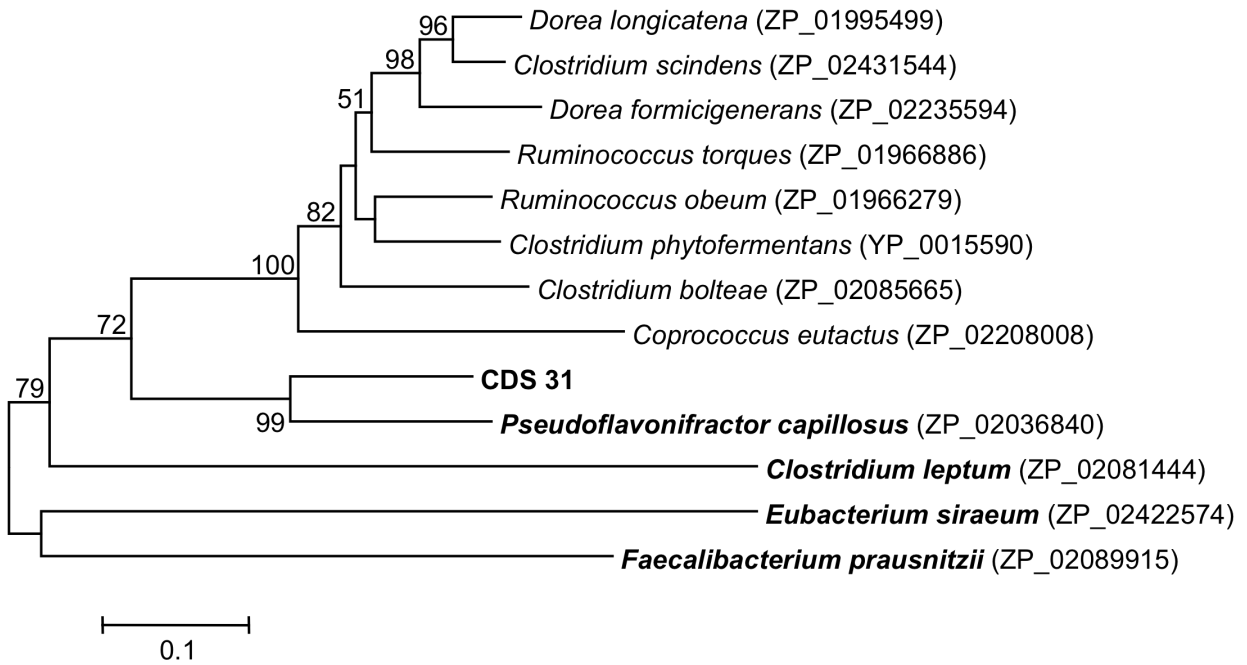

v) CDS 32

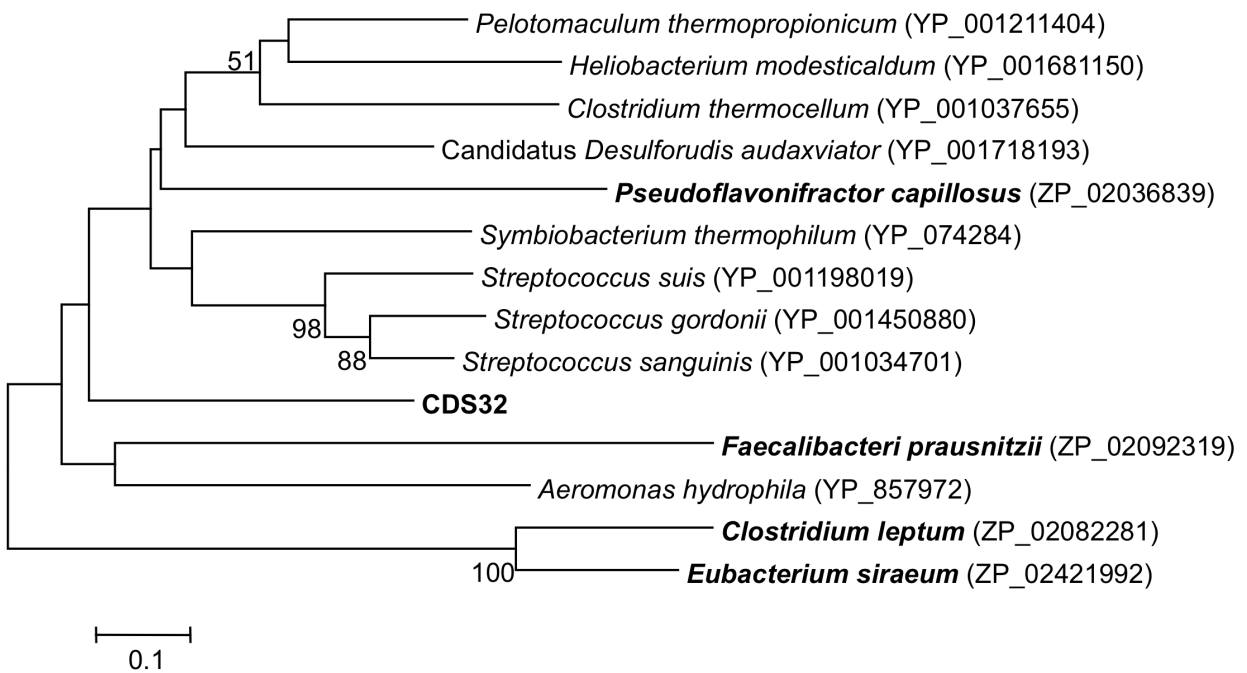

w) CDS 33

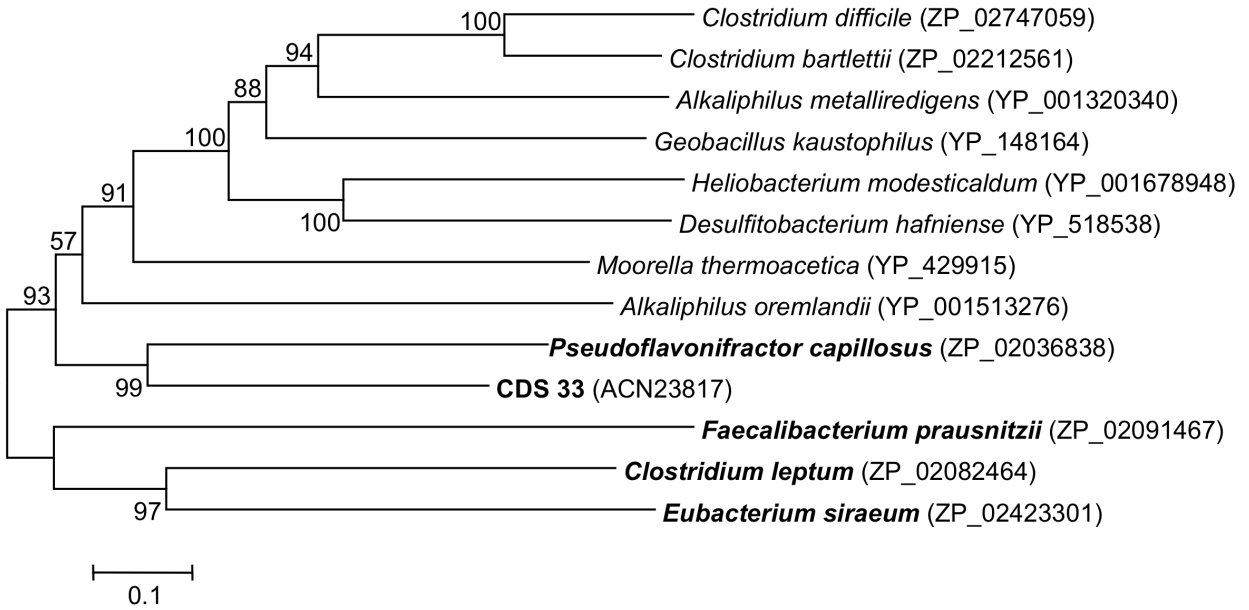

x) CDS 34

Neighbor joining

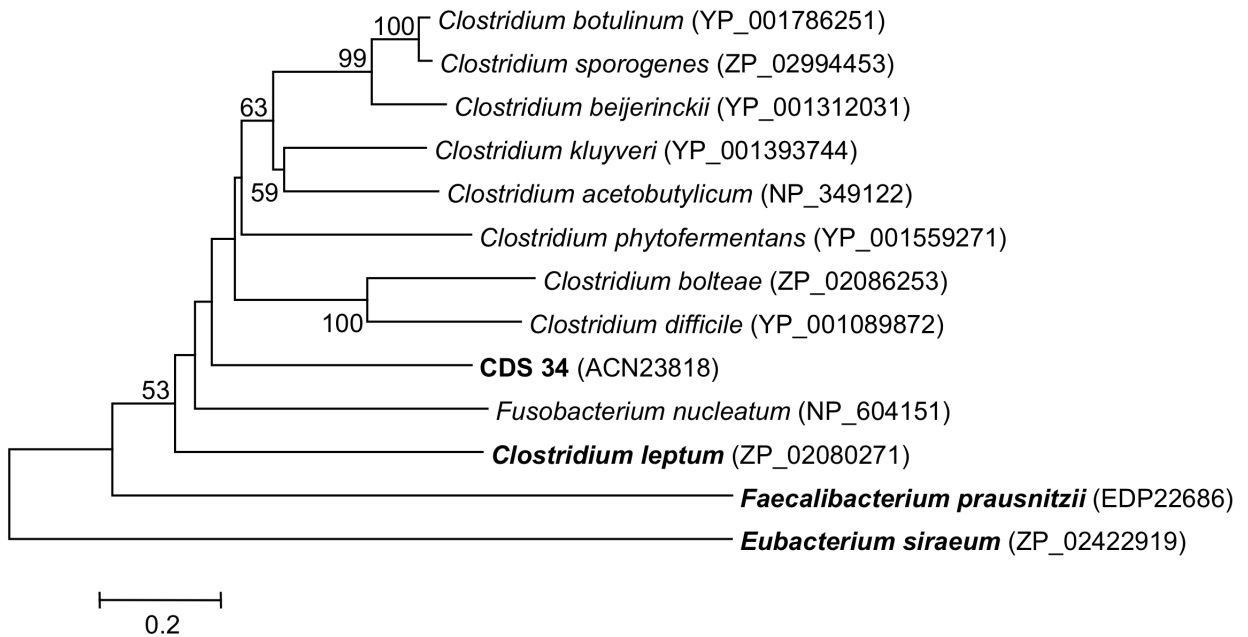

Maximum likelihood

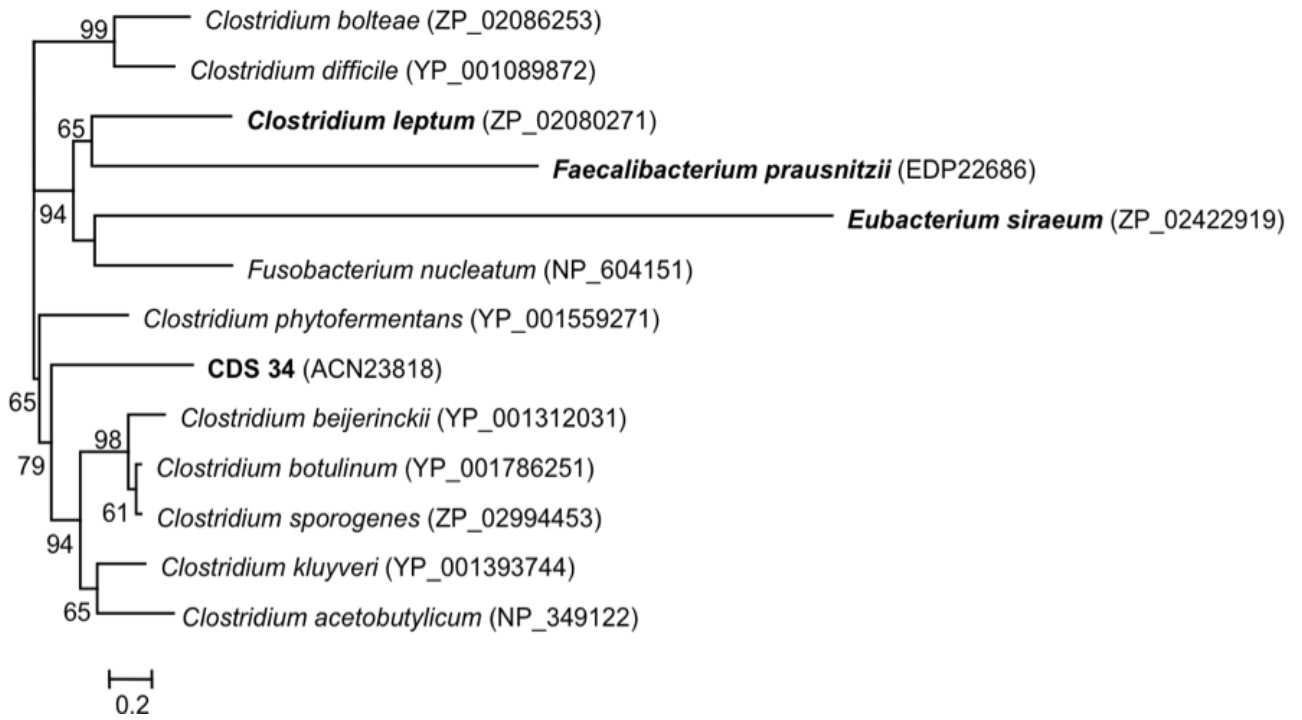

Supplement: pone.0010785.s002.pdf [file pone.0010785.s002.pdf]
