# Supplementary material for: Phylogenetic Evidence for Lateral Gene Transfer in the Intestine of Marine Iguanas
Source: PubMed Central journal article supplement (PMC2875401; doi:10.1371/journal.pone.0010785), 2010-05-24

Figure S3

a) CDS 1

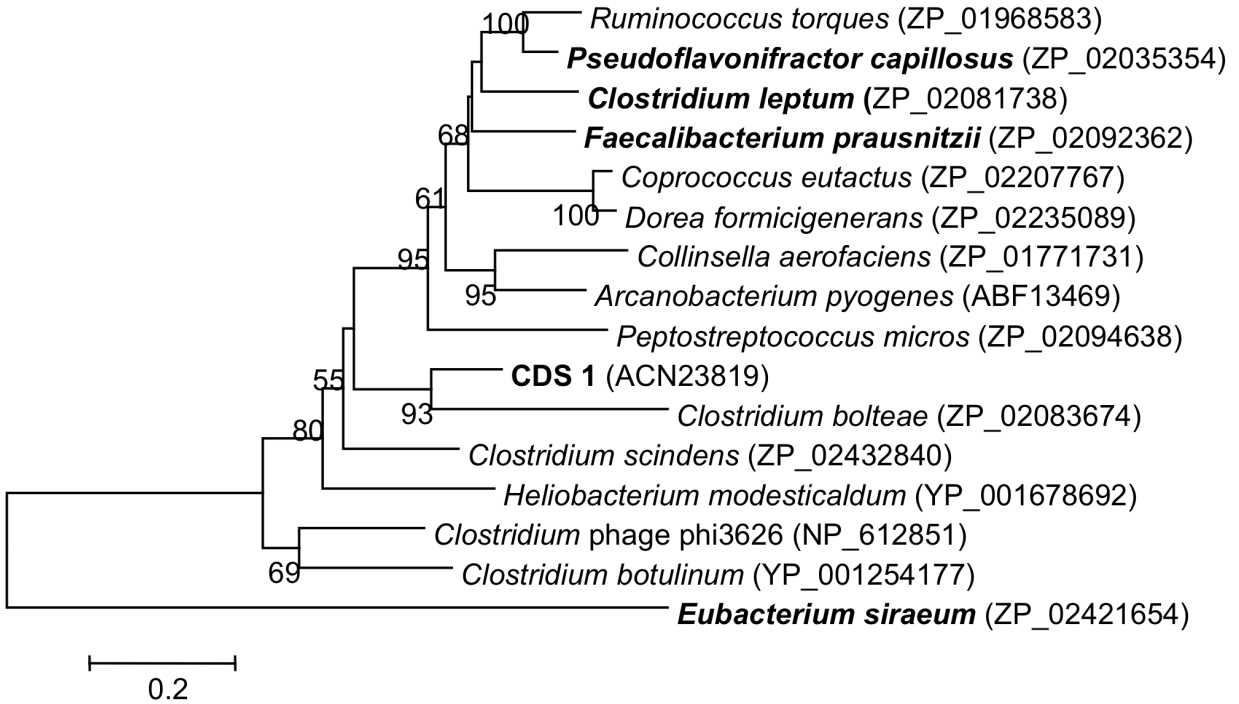

b) CDS 2

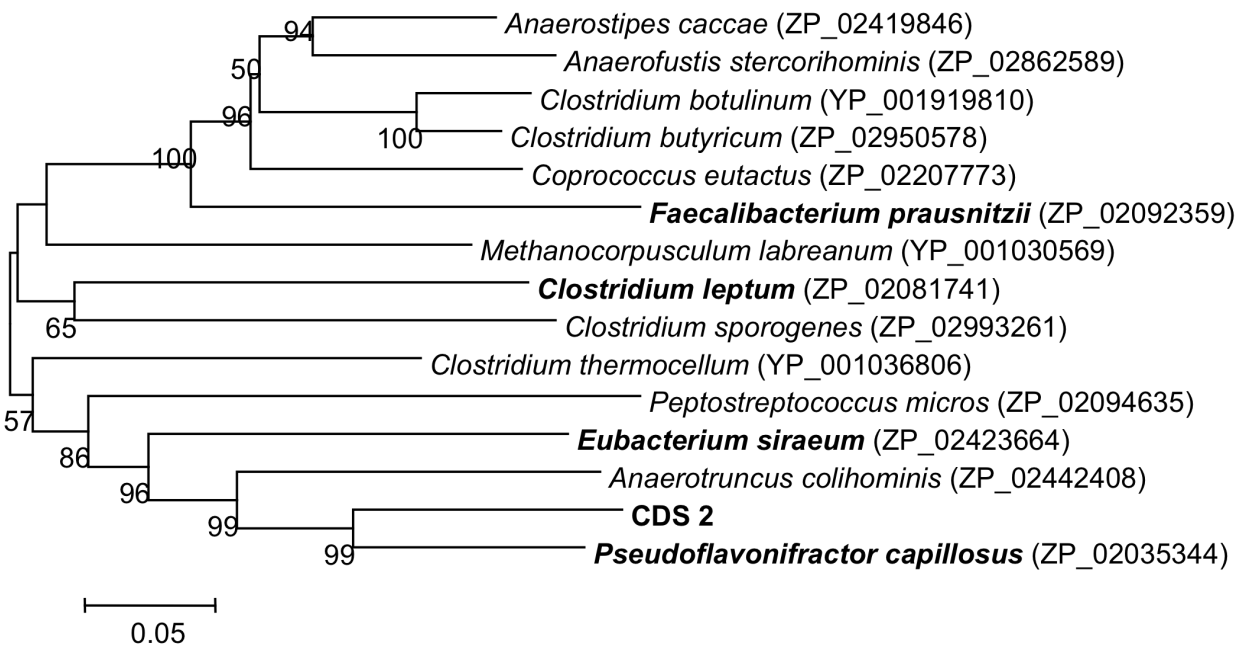

c) CDS 3

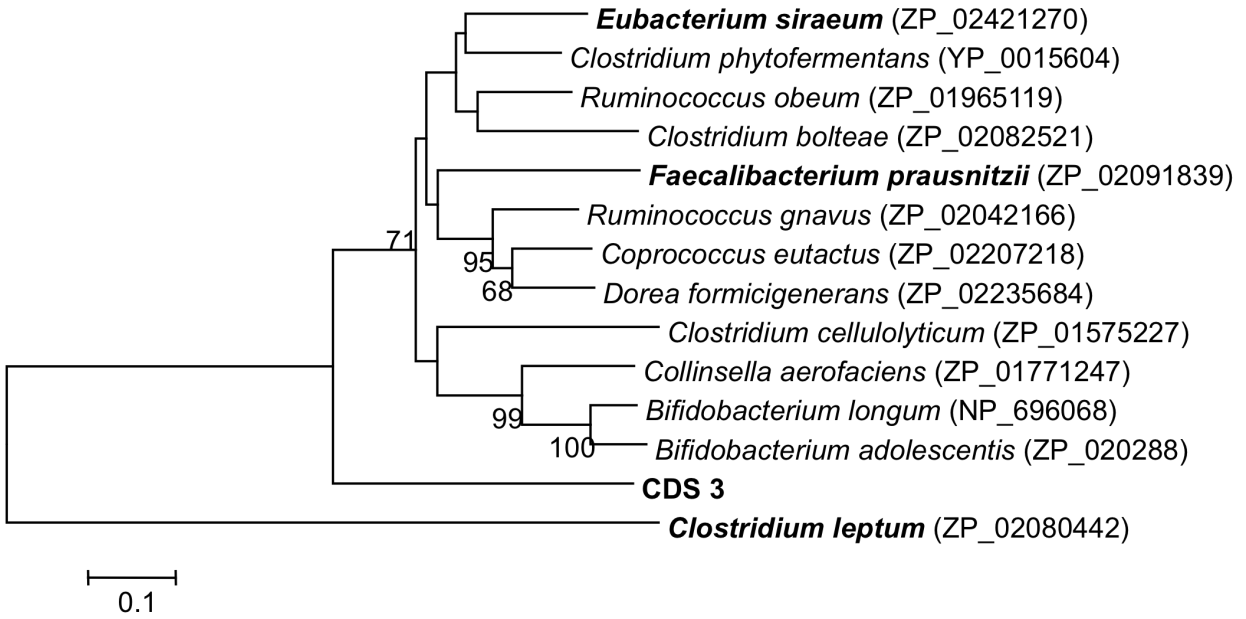

d) CDS 4

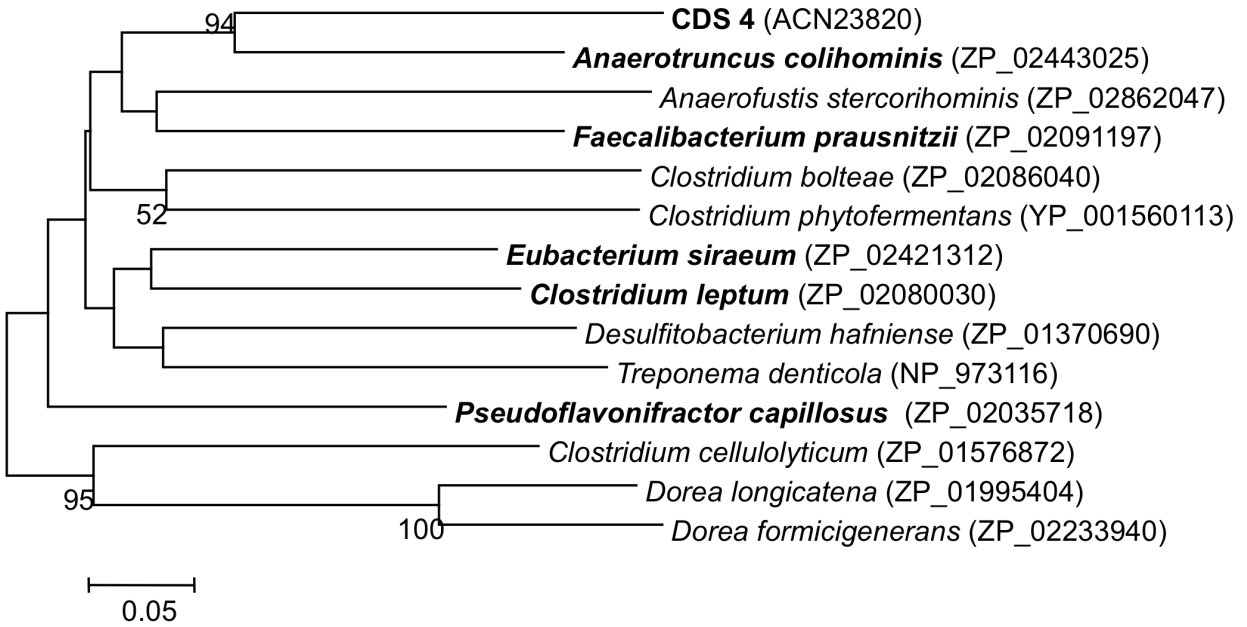

e) CDS 5

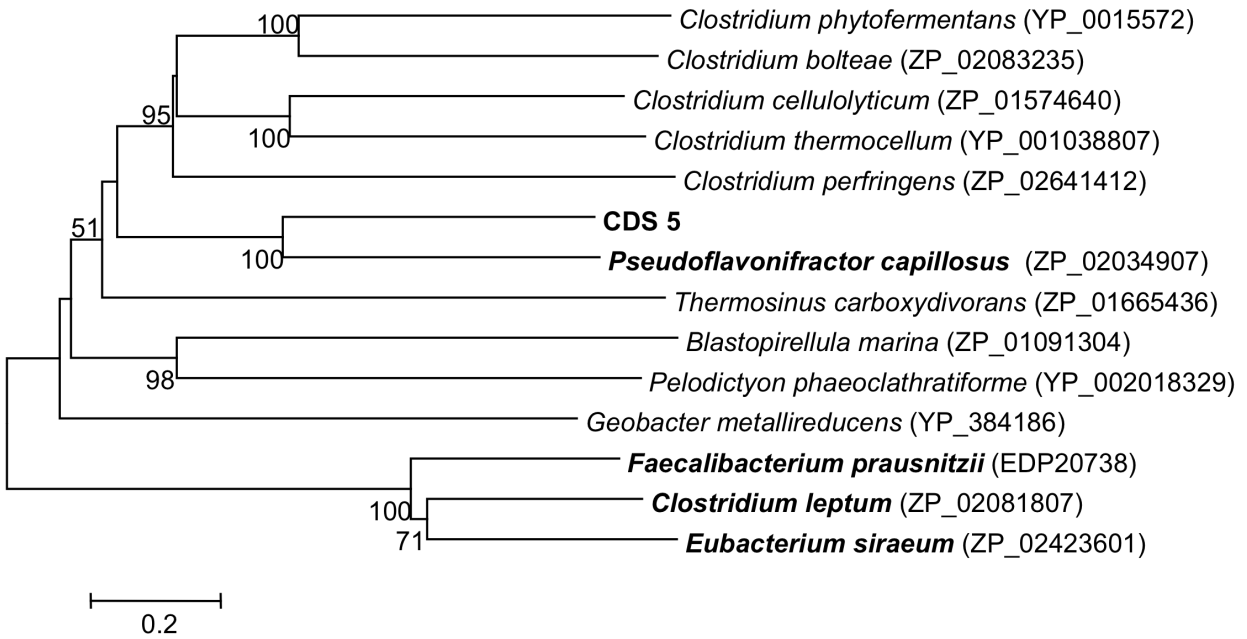

f) CDS 17

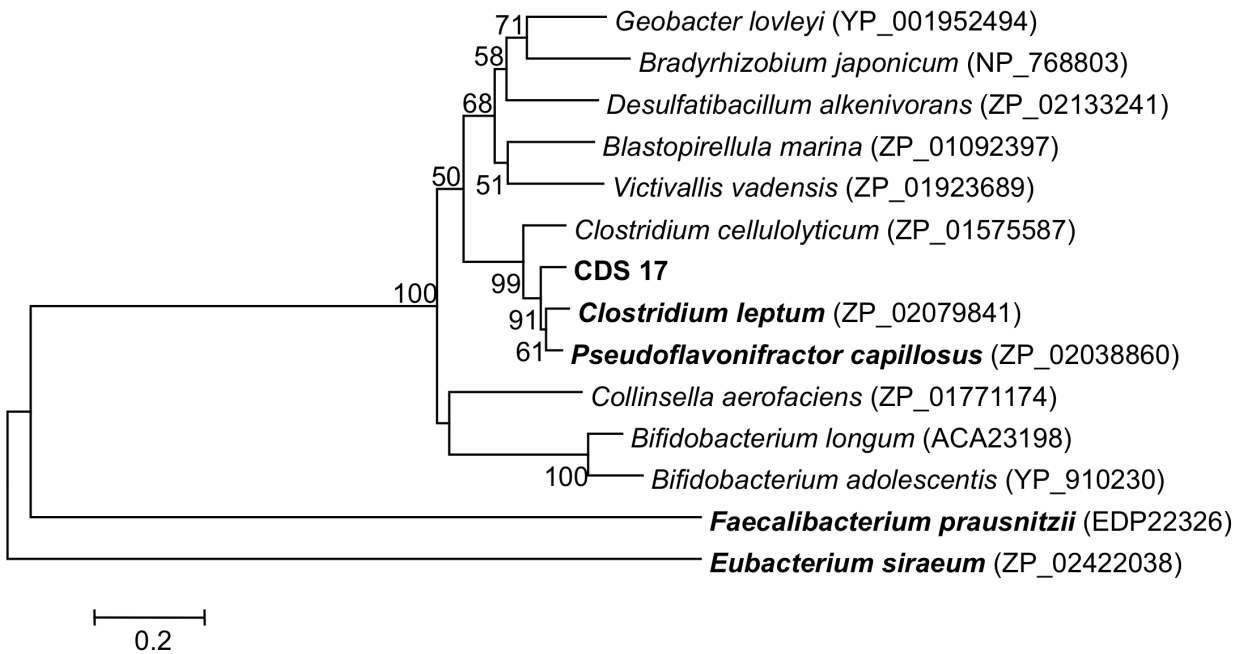

g) CDS 18

Neighbor joining

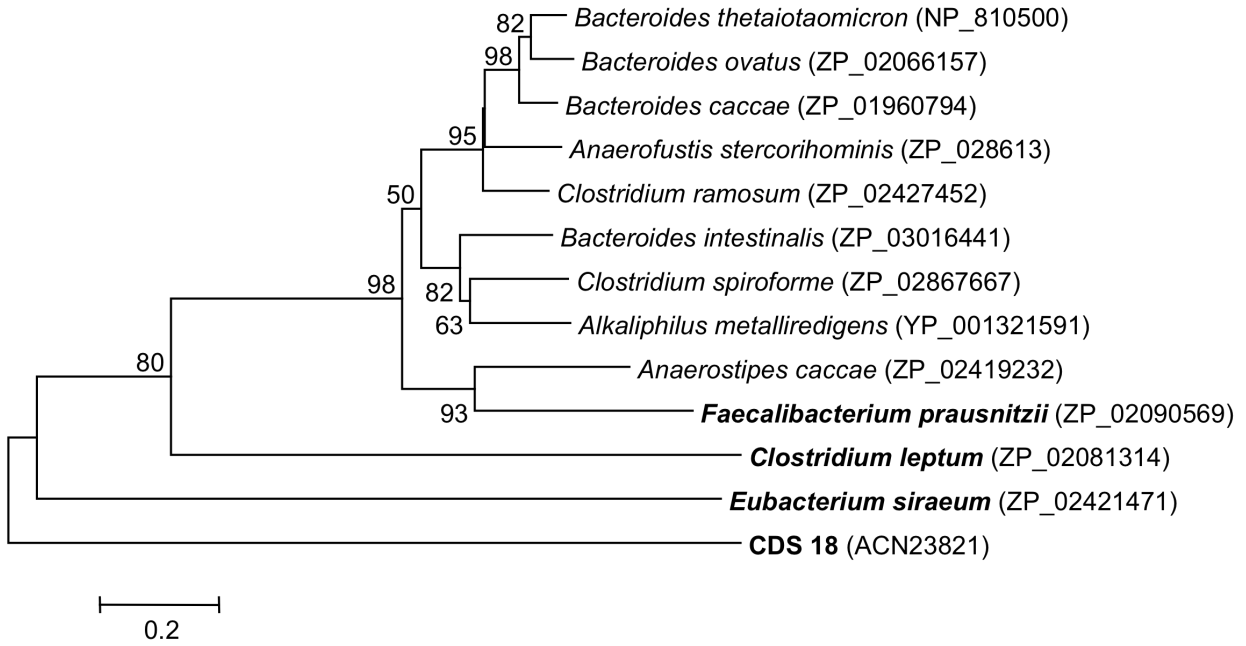

Maximum likelihood

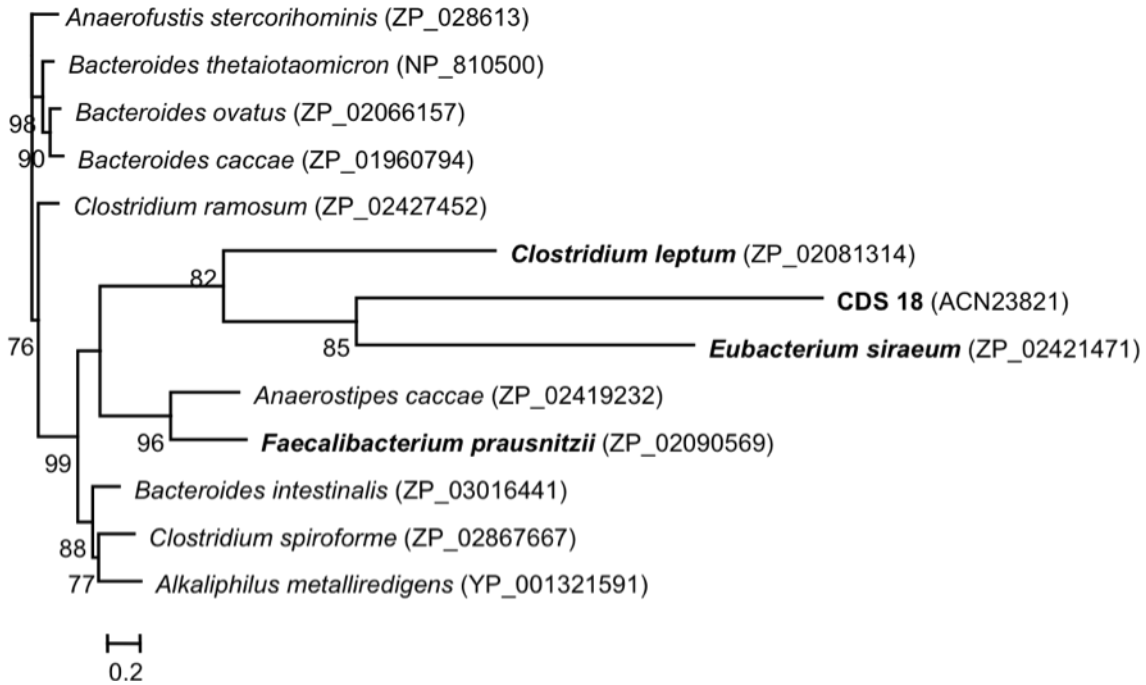

h) CDS 19

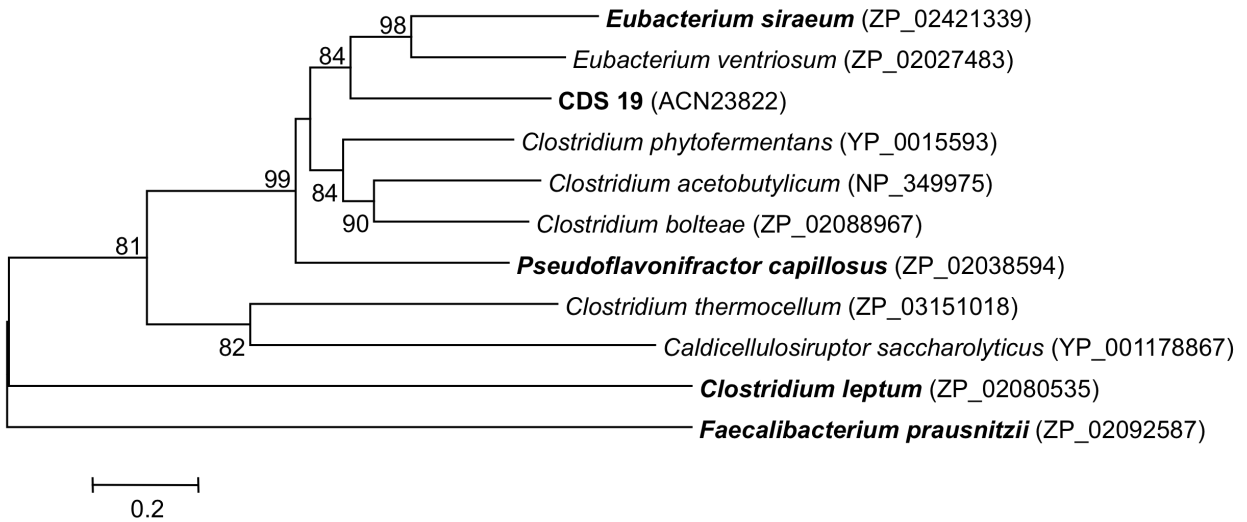

i) CDS 20

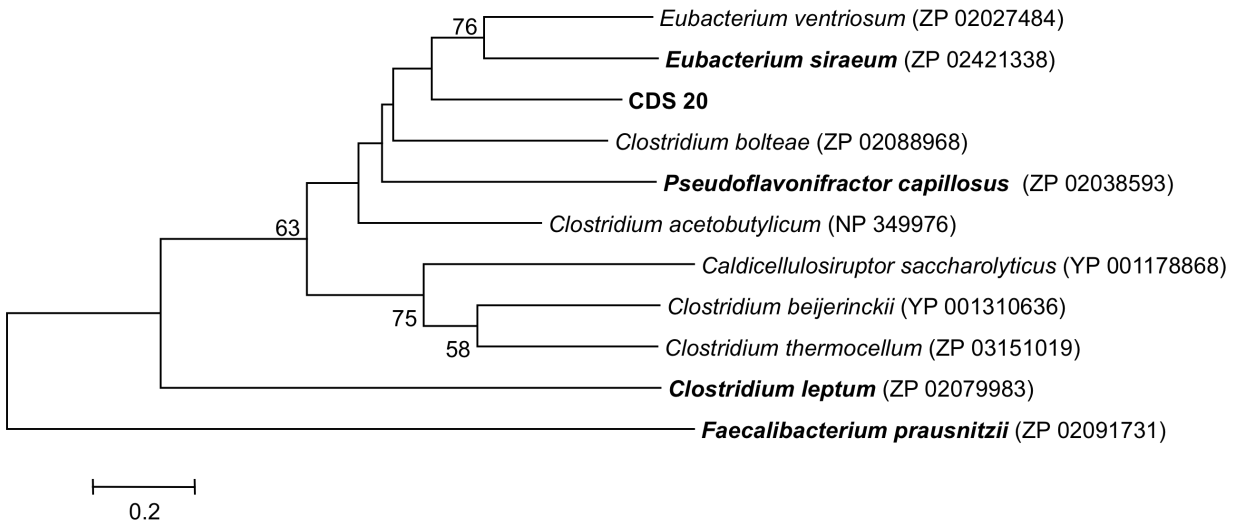

j) CDS 21

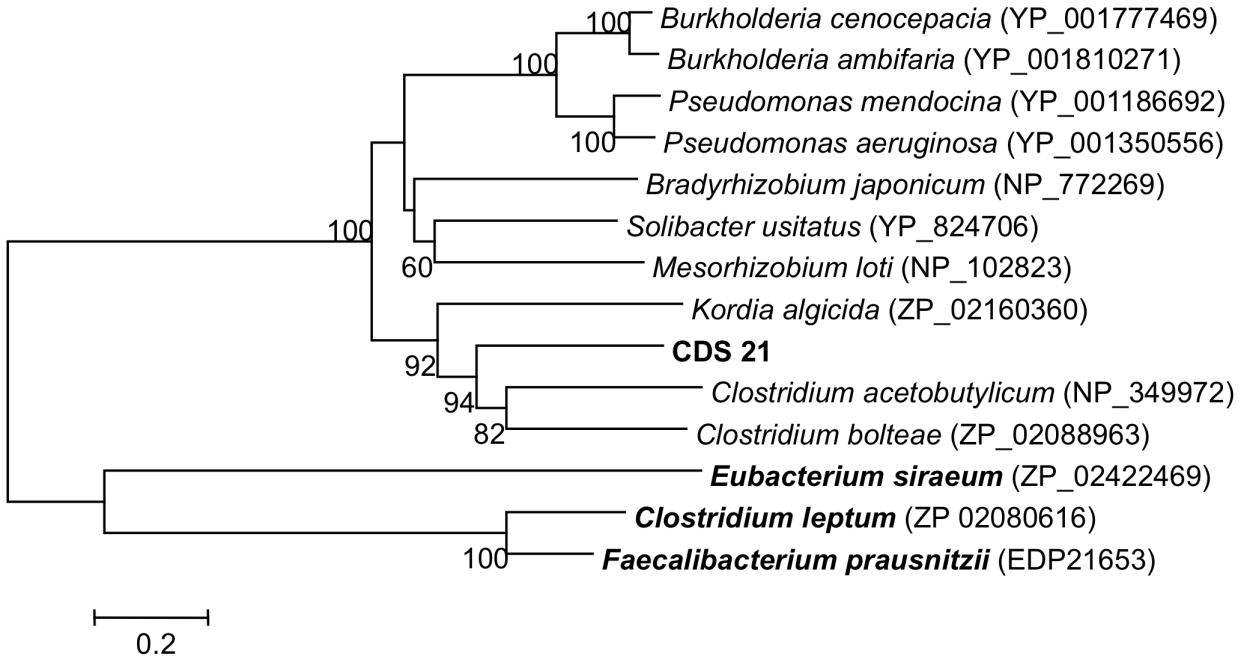

k) CDS 22

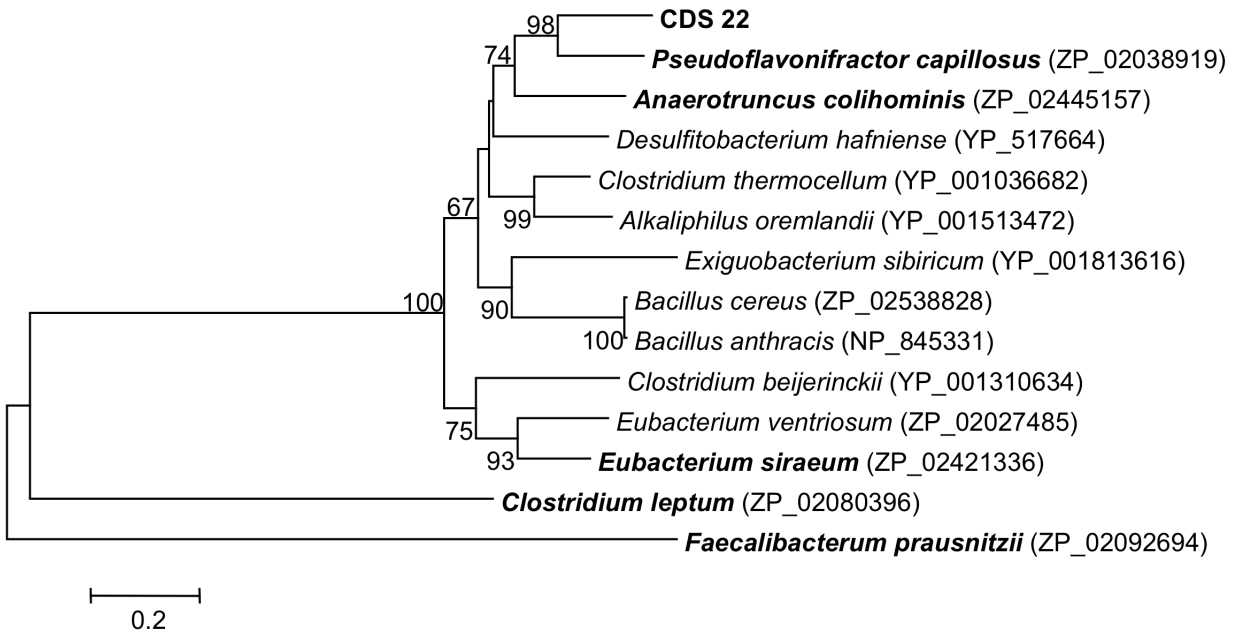

l) CDS 23

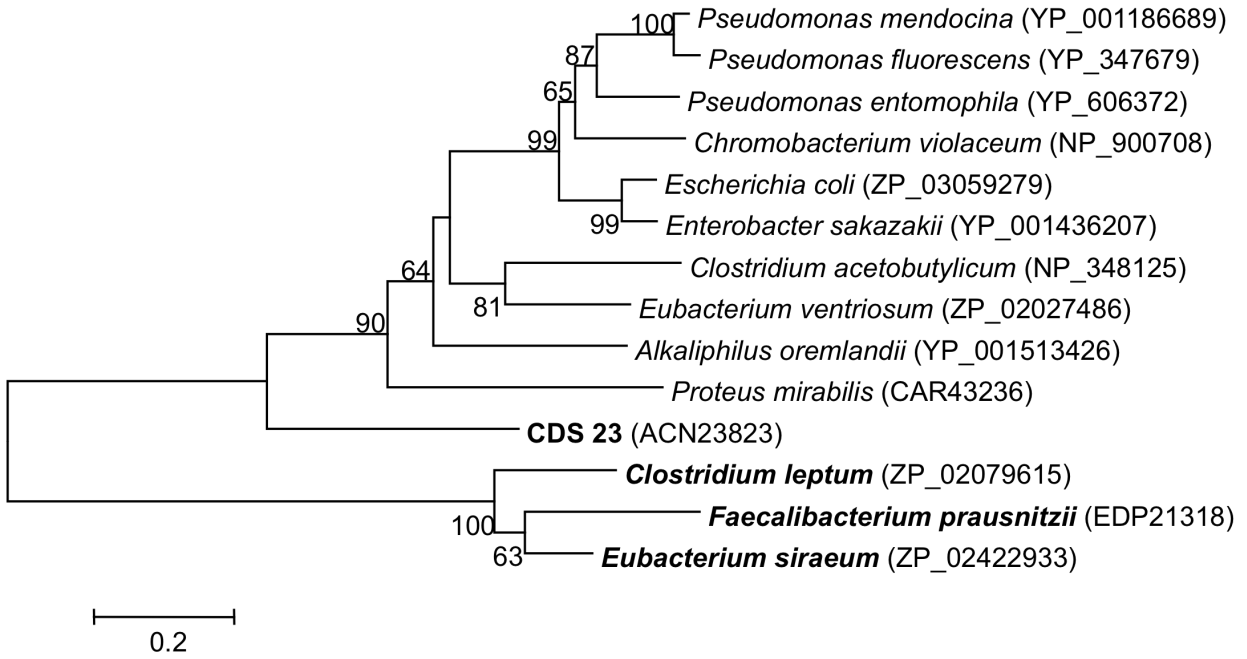

m) CDS 24

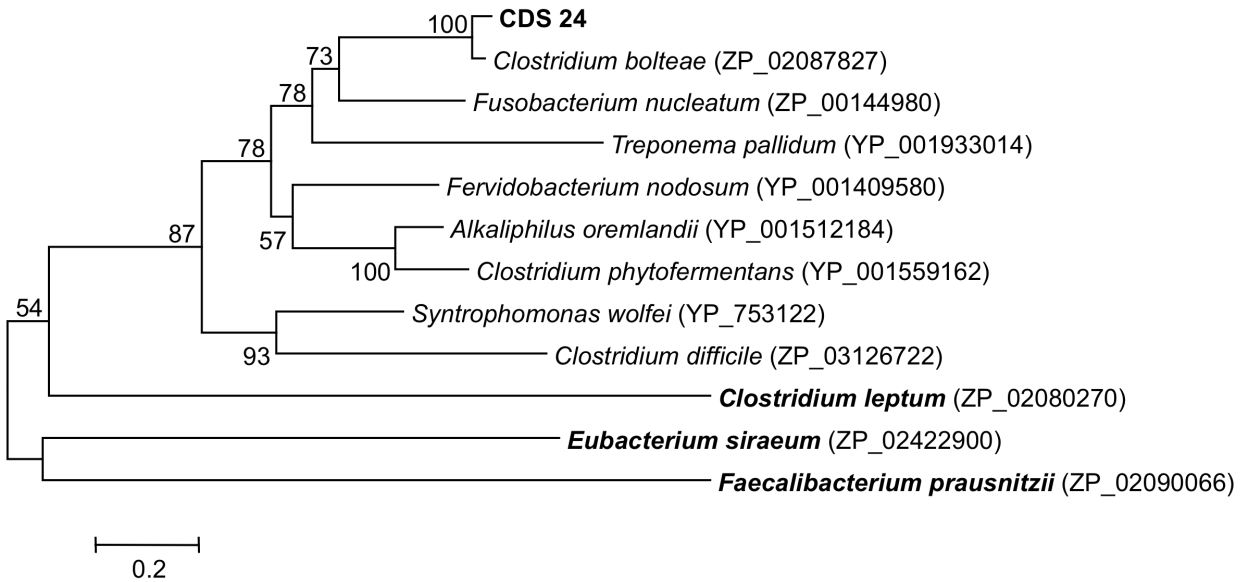

n) CDS 25

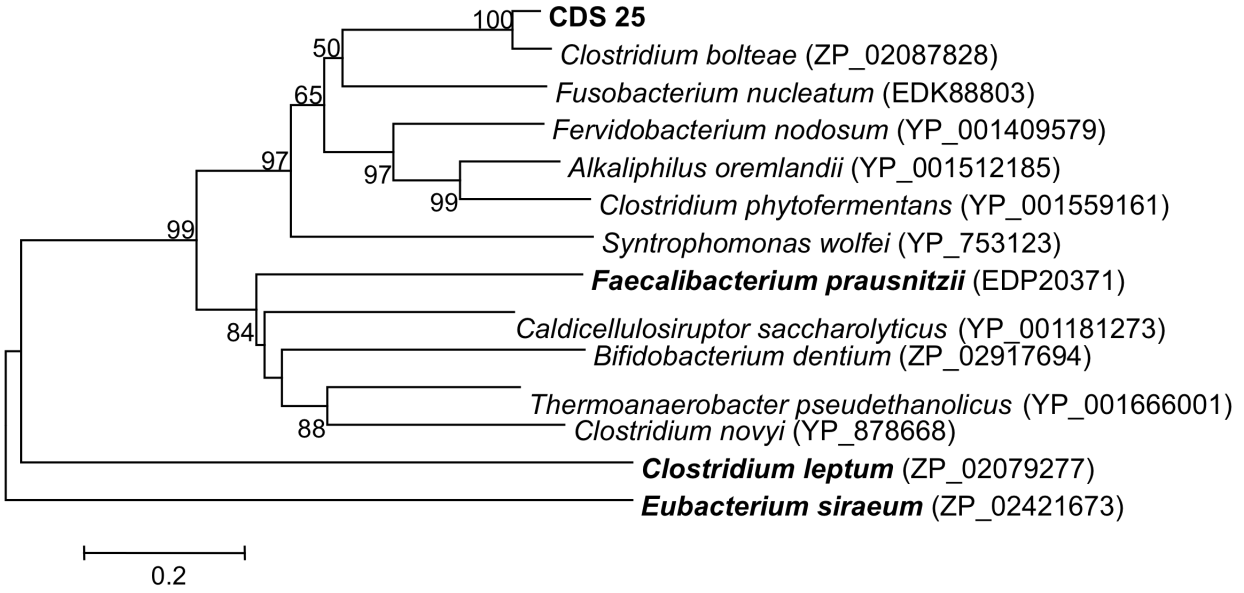

o) CDS 26

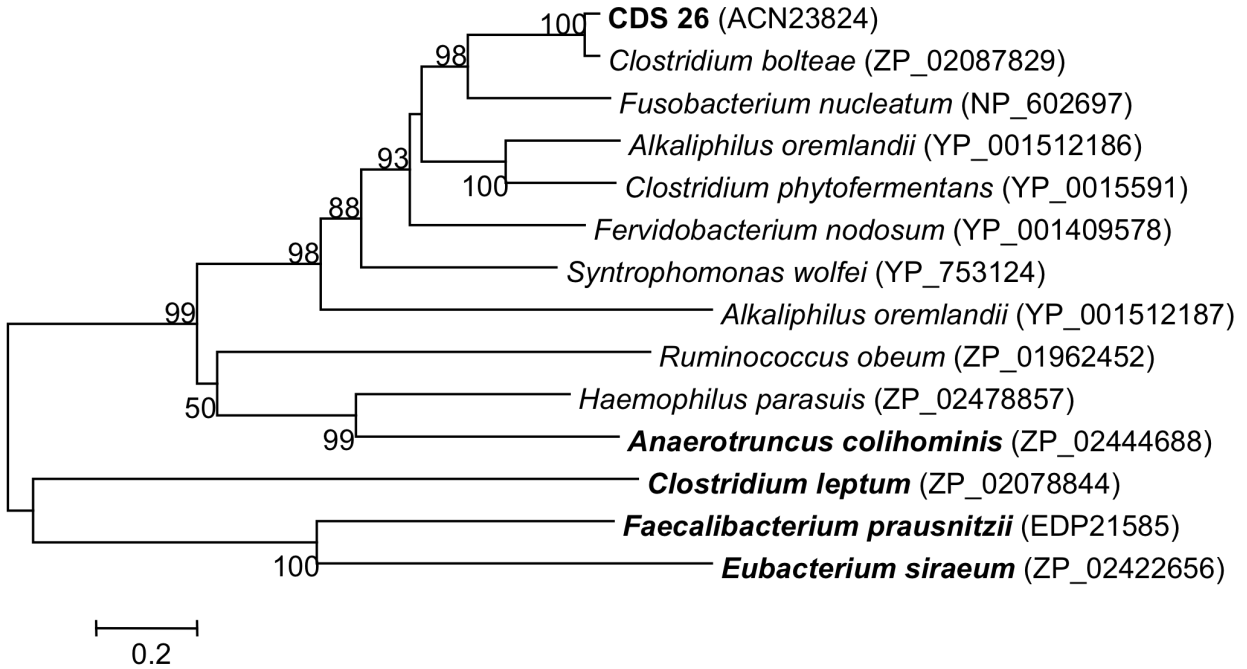



p) CDS 27

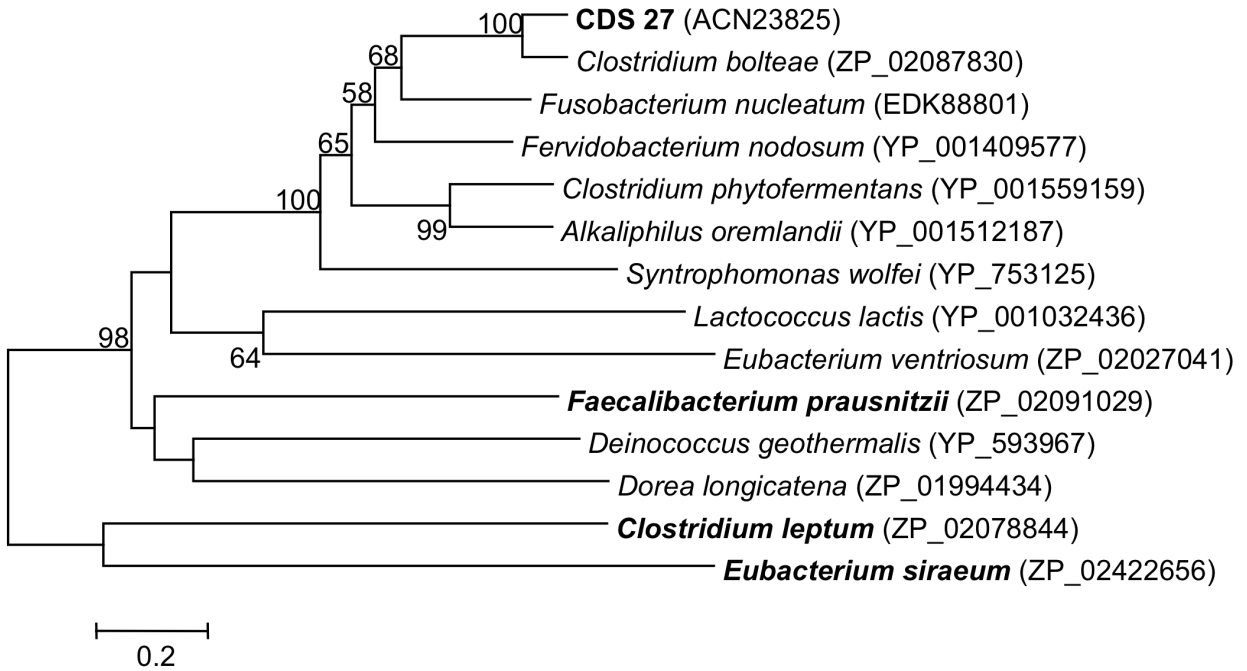

q) CDS 28

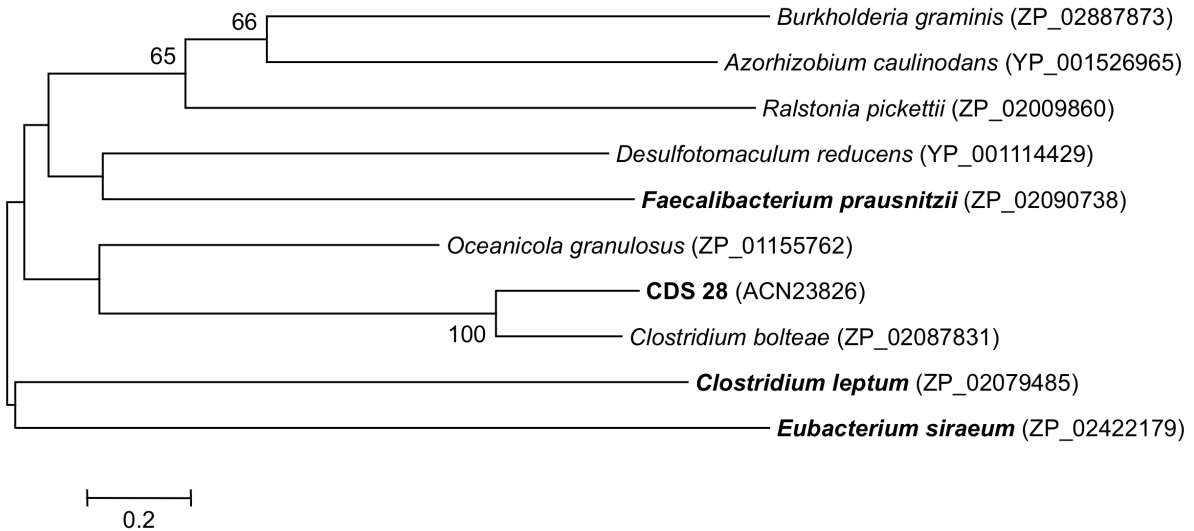

Supplement: pone.0010785.s003.pdf [file pone.0010785.s003.pdf]
