# Supplementary material for: Phylogenetic Evidence for Lateral Gene Transfer in the Intestine of Marine Iguanas
Source: PubMed Central journal article supplement (PMC2875401; doi:10.1371/journal.pone.0010785), 2010-05-24

Figure S1

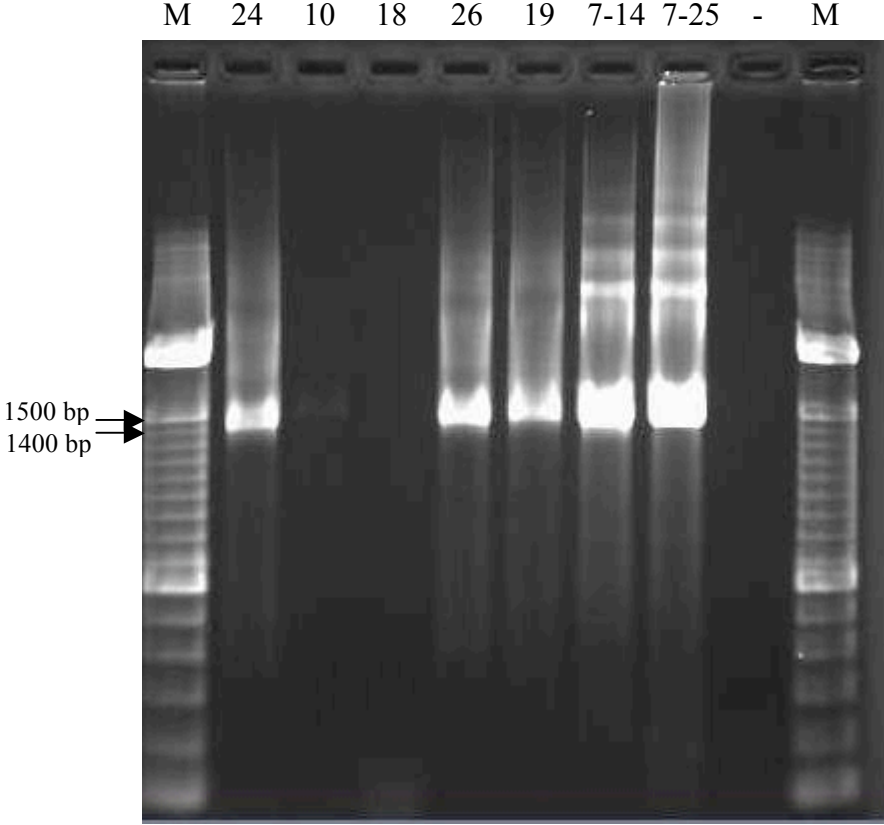

Supplement: pone.0010785.s001.pdf [file pone.0010785.s001.pdf]
